# Supplementary material for: A comprehensive SARS-CoV-2-human protein-protein interactome network identifies pathobiology and host-targeting therapies for COVID-19
Source: Res Sq. 2022 Jun 7:rs.3.rs-1354127. Preprint. [Version 2] doi: 10.21203/rs.3.rs-1354127/v2 (PMC9176654; doi:10.21203/rs.3.rs-1354127/v2)
Supplement: Supplementary Tables [file cc94f2ce4ad3164129d96f11.xlsx]

## Sheet: S1
Table S1. SARS-CoV-2-human protein-protein interactions identified in this study.
Bait	Source	Prey Entrez ID	Prey Symbol
E	Y2H	124245	ZC3H18
E	Y2H	10488	CREB3
E	Y2H	79886	CAAP1
E	AP/MS;Y2H	3615	IMPDH2
E	AP/MS;Y2H	8359	H4C1
E	AP/MS	6161	RPL32
E	AP/MS	6159	RPL29
E	AP/MS	6137	RPL13
E	AP/MS	8815	BANF1
M	Y2H	81786	TRIM7
M	Y2H	153830	RNF145
M	Y2H	55015	PRPF39
M	Y2H	2494	NR5A2
M	Y2H	4780	NFE2L2
M	Y2H	4107	MAGEA8
M	Y2H	51194	IPO11
M	Y2H	8520	HAT1
M	Y2H	2990	GUSB
M	Y2H	65056	GPBP1
M	Y2H	9710	KIAA0355
M	Y2H	2135	EXTL2
M	Y2H	51290	ERGIC2
M	Y2H	80279	CDK5RAP3
M	Y2H	146439	BICDL2
M	AP/MS	7112	TMPO
M	AP/MS	6510	SLC1A5
M	AP/MS	142	PARP1
M	AP/MS	3980	LIG3
M	AP/MS	2010	EMD
M	AP/MS	488	ATP2A2
M	AP/MS	476	ATP1A1
N	Y2H	8045	RASSF7
N	Y2H	8575	PRKRA
N	Y2H	28227	PPP2R3B
N	Y2H	26986	PABPC1
N	Y2H	55093	WDYHV1
N	Y2H	26548	ITGB1BP2
N	Y2H	65056	GPBP1
N	Y2H	100132565	GOLGA8F
N	Y2H	54810	GIPC2
N	Y2H	705	BYSL
N	Y2H	10094	ARPC3
N	AP/MS;Y2H	6194	RPS6
N	AP/MS;Y2H	6160	RPL31
N	AP/MS;Y2H	55178	MRM3
N	AP/MS;Y2H	10146	G3BP1
N	AP/MS	51106	TFB1M
N	AP/MS	10492	SYNCRIP
N	AP/MS	26156	RSL1D1
N	AP/MS	6203	RPS9
N	AP/MS	6202	RPS8
N	AP/MS	6191	RPS4X
N	AP/MS	6229	RPS24
N	AP/MS	6210	RPS15A
N	AP/MS	6159	RPL29
N	AP/MS	6157	RPL27A
N	AP/MS	494115	RBMXL1
N	AP/MS	27316	RBMX
N	AP/MS	84305	PYM1
N	AP/MS	51491	NOP16
N	AP/MS	84365	NIFK
N	AP/MS	65003	MRPL11
N	AP/MS	4343	MOV10
N	AP/MS	55132	LARP1B
N	AP/MS	23367	LARP1
N	AP/MS	50809	HP1BP3
N	AP/MS	10236	HNRNPR
N	AP/MS	3189	HNRNPH3
N	AP/MS	3182	HNRNPAB
N	AP/MS	220988	HNRNPA3
N	AP/MS	3181	HNRNPA2B1
N	AP/MS	3178	HNRNPA1
N	AP/MS	10949	HNRNPA0
N	AP/MS	3009	H1-5
N	AP/MS	3008	H1-4
N	AP/MS	3007	H1-3
N	AP/MS	3006	H1-2
N	AP/MS	29889	GNL2
N	AP/MS	9908	G3BP2
N	AP/MS	1993	ELAVL2
N	AP/MS	27292	DIMT1
N	AP/MS	51202	DDX47
N	AP/MS	84319	CMSS1
N	AP/MS	8436	CAVIN2
N	AP/MS	284119	CAVIN1
N	AP/MS	4076	CAPRIN1
N	AP/MS	29777	ABT1
nsp1	Y2H	8914	TIMELESS
nsp1	Y2H	56159	TEX11
nsp1	Y2H	23649	POLA2
nsp1	Y2H	5318	PKP2
nsp1	Y2H	6297	SALL2
nsp1	AP/MS;Y2H	23650	TRIM29
nsp1	AP/MS;Y2H	5955	RCN2
nsp1	AP/MS;Y2H	5954	RCN1
nsp1	AP/MS;Y2H	10432	RBM14
nsp1	AP/MS;Y2H	813	CALU
nsp1	AP/MS	286077	FAM83H
nsp10	AP/MS;Y2H	4641	MYO1C
nsp10	Y2H	26548	ITGB1BP2
nsp10	Y2H	3101	HK3
nsp10	Y2H	832	CAPZB
nsp10	Y2H	161	AP2A2
nsp10	Y2H	5832	ALDH18A1
nsp10	Y2H	2671	GFER
nsp10	AP/MS	6840	SVIL
nsp10	AP/MS	23384	SPECC1L
nsp10	AP/MS	5573	PRKAR1A
nsp10	AP/MS	4659	PPP1R12A
nsp10	AP/MS	4642	MYO1D
nsp10	AP/MS	4430	MYO1B
nsp10	AP/MS	399687	MYO18A
nsp10	AP/MS	126353	MISP
nsp10	AP/MS	51474	LIMA1
nsp10	AP/MS	2770	GNAI1
nsp10	AP/MS	79180	EFHD2
nsp10	AP/MS	1627	DBN1
nsp12	Y2H	159195	USP54
nsp12	Y2H	9898	UBAP2L
nsp12	Y2H	5987	TRIM27
nsp12	Y2H	6938	TCF12
nsp12	Y2H	8737	RIPK1
nsp12	Y2H	55285	RBM41
nsp12	Y2H	54477	PLEKHA5
nsp12	Y2H	4223	MEOX2
nsp12	Y2H	26128	KIFBP
nsp12	Y2H	2801	GOLGA2
nsp12	Y2H	83706	FERMT3
nsp12	Y2H	8573	CASK
nsp12	Y2H	57016	AKR1B10
nsp12	AP/MS	7082	TJP1
nsp12	AP/MS	6494	SIPA1
nsp12	AP/MS	170954	PPP1R18
nsp12	AP/MS	64236	PDLIM2
nsp12	AP/MS	4008	LMO7
nsp12	AP/MS	3898	LAD1
nsp12	AP/MS	1611	DAP
nsp12	AP/MS	23603	CORO1C
nsp12	AP/MS	10523	CHERP
nsp12	AP/MS	81	ACTN4
nsp12	AP/MS	87	ACTN1
nsp12	AP/MS	32	ACACB
nsp12	AP/MS	31	ACACA
nsp13	Y2H	51270	TFDP3
nsp13	Y2H	5962	RDX
nsp13	Y2H	8045	RASSF7
nsp13	Y2H	152789	JAKMIP1
nsp13	Y2H	64689	GORASP1
nsp13	Y2H	2801	GOLGA2
nsp13	Y2H	79443	FYCO1
nsp13	Y2H	57016	AKR1B10
nsp13	Y2H	79745	CLIP4
nsp13	Y2H	9659	PDE4DIP
nsp13	Y2H	10142	AKAP9
nsp13	AP/MS;Y2H	4191	MDH2
nsp13	AP/MS;Y2H	81	ACTN4
nsp13	AP/MS	6525	SMTN
nsp13	AP/MS	5339	PLEC
nsp13	AP/MS	5230	PGK1
nsp13	AP/MS	64236	PDLIM2
nsp13	AP/MS	3945	LDHB
nsp13	AP/MS	3939	LDHA
nsp13	AP/MS	2597	GAPDH
nsp13	AP/MS	1213	CLTC
nsp13	AP/MS	87	ACTN1
nsp14	Y2H	58500	ZNF250
nsp14	Y2H	83637	ZMIZ2
nsp14	Y2H	2547	XRCC6
nsp14	Y2H	5987	TRIM27
nsp14	Y2H	6925	TCF4
nsp14	Y2H	200734	SPRED2
nsp14	Y2H	5966	REL
nsp14	Y2H	5522	PPP2R2C
nsp14	Y2H	4223	MEOX2
nsp14	Y2H	222484	LNX2
nsp14	Y2H	26128	KIFBP
nsp14	Y2H	2801	GOLGA2
nsp14	Y2H	10094	ARPC3
nsp14	AP/MS	7381	UQCRB
nsp14	AP/MS	6158	RPL28
nsp14	AP/MS	27000	DNAJC2
nsp14	AP/MS	66005	CHID1
nsp15	Y2H	26576	SRPK3
nsp15	Y2H	10432	RBM14
nsp15	Y2H	222484	LNX2
nsp15	Y2H	4001	LMNB1
nsp15	Y2H	84643	KIF2B
nsp15	Y2H	26548	ITGB1BP2
nsp15	Y2H	8894	EIF2S2
nsp15	Y2H	283638	CEP170B
nsp15	Y2H	10973	ASCC3
nsp15	Y2H	382	ARF6
nsp15	Y2H	81	ACTN4
nsp15	Y2H	87	ACTN1
nsp15	AP/MS;Y2H	5955	RCN2
nsp15	AP/MS	7431	VIM
nsp15	AP/MS	23650	TRIM29
nsp15	AP/MS	83442	SH3BGRL3
nsp15	AP/MS	5954	RCN1
nsp15	AP/MS	5339	PLEC
nsp15	AP/MS	8139	GAN
nsp15	AP/MS	83481	EPPK1
nsp15	AP/MS	813	CALU
nsp16	Y2H	5987	TRIM27
nsp16	Y2H	56159	TEX11
nsp16	Y2H	6925	TCF4
nsp16	Y2H	5966	REL
nsp16	Y2H	5015	OTX2
nsp16	Y2H	26128	KIFBP
nsp16	Y2H	388324	INCA1
nsp16	AP/MS	7431	VIM
nsp16	AP/MS	23376	UFL1
nsp16	AP/MS	7157	TP53
nsp16	AP/MS	6711	SPTBN1
nsp16	AP/MS	6709	SPTAN1
nsp16	AP/MS	58517	RBM25
nsp16	AP/MS	55660	PRPF40A
nsp16	AP/MS	170954	PPP1R18
nsp16	AP/MS	5209	PFKFB3
nsp16	AP/MS	9643	MORF4L2
nsp16	AP/MS	10933	MORF4L1
nsp16	AP/MS	51474	LIMA1
nsp16	AP/MS	3898	LAD1
nsp16	AP/MS	3615	IMPDH2
nsp16	AP/MS	79180	EFHD2
nsp16	AP/MS	23603	CORO1C
nsp16	AP/MS	83543	AIF1L
nsp16	AP/MS	79026	AHNAK
nsp16	AP/MS	81	ACTN4
nsp16	AP/MS	88	ACTN2
nsp16	AP/MS	87	ACTN1
nsp2	Y2H	23325	WASHC4
nsp2	Y2H	5910	RAP1GDS1
nsp2	Y2H	8826	IQGAP1
nsp2	Y2H	2115	ETV1
nsp2	Y2H	81	ACTN4
nsp2	Y2H	6744	ITPRID2
nsp2	AP/MS	9967	THRAP3
nsp2	AP/MS	6418	SET
nsp2	AP/MS	3655	ITGA6
nsp2	AP/MS	3615	IMPDH2
nsp2	AP/MS	3614	IMPDH1
nsp2	AP/MS	3069	HDLBP
nsp2	AP/MS	2618	GART
nsp2	AP/MS	23344	ESYT1
nsp2	AP/MS	2079	ERH
nsp2	AP/MS	1982	EIF4G2
nsp2	AP/MS	1973	EIF4A1
nsp2	AP/MS	1915	EEF1A1
nsp2	AP/MS	7812	CSDE1
nsp2	AP/MS	9774	BCLAF1
nsp2	AP/MS	440	ASNS
nsp3	Y2H	55254	TMEM39A
nsp3	Y2H	166	TLE5
nsp3	Y2H	6760	SS18
nsp3	Y2H	6003	RGS13
nsp3	Y2H	25898	RCHY1
nsp3	Y2H	51422	PRKAG2
nsp3	Y2H	4107	MAGEA8
nsp3	Y2H	8687	KRT38
nsp3	Y2H	26128	KIFBP
nsp3	Y2H	253980	KCTD13
nsp3	Y2H	374875	HSD11B1L
nsp3	Y2H	64395	GMCL1
nsp3	Y2H	9513	FXR2
nsp3	Y2H	2274	FHL2
nsp3	Y2H	83706	FERMT3
nsp3	Y2H	2207	FCER1G
nsp3	Y2H	23197	FAF2
nsp3	Y2H	1406	CRX
nsp3	Y2H	285753	CEP57L1
nsp3	Y2H	222389	BEND7
nsp3	Y2H	539	ATP5PO
nsp3	Y2H	57016	AKR1B10
nsp3	Y2H	85464	SSH2
nsp3	AP/MS	64710	NUCKS1
nsp3	AP/MS	10473	HMGN4
nsp3	AP/MS	3151	HMGN2
nsp3	AP/MS	3150	HMGN1
nsp3	AP/MS	3159	HMGA1
nsp3	AP/MS	11335	CBX3
nsp4	Y2H	1958	EGR1
nsp4	AP/MS	5479	PPIB
nsp4	AP/MS	10130	PDIA6
nsp4	AP/MS	9601	PDIA4
nsp4	AP/MS	2923	PDIA3
nsp4	AP/MS	5096	PCCB
nsp4	AP/MS	5095	PCCA
nsp4	AP/MS	5034	P4HB
nsp4	AP/MS	4191	MDH2
nsp4	AP/MS	3954	LETM1
nsp4	AP/MS	10134	BCAP31
nsp4	AP/MS	93974	ATP5IF1
nsp5	Y2H	6760	SS18
nsp5	Y2H	222484	LNX2
nsp5	Y2H	26548	ITGB1BP2
nsp5	AP/MS;Y2H	3615	IMPDH2
nsp5	AP/MS;Y2H	81608	FIP1L1
nsp5	AP/MS	80829	ZFP91
nsp5	AP/MS	22980	TCF25
nsp5	AP/MS	8148	TAF15
nsp5	AP/MS	6786	STIM1
nsp5	AP/MS	8879	SGPL1
nsp5	AP/MS	6421	SFPQ
nsp5	AP/MS	55153	SDAD1
nsp5	AP/MS	6181	RPLP2
nsp5	AP/MS	6169	RPL38
nsp5	AP/MS	55771	PRR11
nsp5	AP/MS	4841	NONO
nsp5	AP/MS	51149	MRNIP
nsp5	AP/MS	112950	MED8
nsp5	AP/MS	29079	MED4
nsp5	AP/MS	55588	MED29
nsp5	AP/MS	9862	MED24
nsp5	AP/MS	9439	MED23
nsp5	AP/MS	9440	MED17
nsp5	AP/MS	9282	MED14
nsp5	AP/MS	4113	MAGEB2
nsp5	AP/MS	3614	IMPDH1
nsp5	AP/MS	81610	FAM83D
nsp5	AP/MS	23404	EXOSC2
nsp5	AP/MS	80153	EDC3
nsp5	AP/MS	9646	CTR9
nsp5	AP/MS	11101	ATE1
nsp5	AP/MS	1176	AP3S1
nsp5	AP/MS	8943	AP3D1
nsp5	AP/MS	8546	AP3B1
nsp5	AP/MS	10189	ALYREF
nsp5_C145A_MU	Y2H	2876	GPX1
nsp5_C145A_MU	AP/MS	388697	HRNR
nsp6	Y2H	105375355	UPK3B
nsp6	Y2H	80727	TTYH3
nsp6	Y2H	5987	TRIM27
nsp6	Y2H	90407	TMEM41A
nsp6	Y2H	201799	TMEM154
nsp6	Y2H	6760	SS18
nsp6	Y2H	28227	PPP2R3B
nsp6	Y2H	84445	LZTS2
nsp6	Y2H	57151	LYZL6
nsp6	Y2H	3768	KCNJ12
nsp6	Y2H	2823	GPM6A
nsp6	Y2H	65056	GPBP1
nsp6	Y2H	51234	EMC4
nsp6	Y2H	1718	DHCR24
nsp6	Y2H	1266	CNN3
nsp6	Y2H	130162	CLHC1
nsp6	Y2H	857	CAV1
nsp6	Y2H	11194	ABCB8
nsp6	Y2H	54812	AFTPH
nsp6	AP/MS	85364	ZCCHC3
nsp6	AP/MS	7416	VDAC1
nsp6	AP/MS	10280	SIGMAR1
nsp6	AP/MS	4029	L1RE1
nsp6	AP/MS	213	ALB
nsp7	Y2H	55829	SELENOS
nsp7	Y2H	6386	SDCBP
nsp7	Y2H	949	SCARB1
nsp7	Y2H	4218	RAB8A
nsp7	Y2H	80142	PTGES2
nsp7	Y2H	222484	LNX2
nsp7	Y2H	595	CCND1
nsp7	AP/MS	5636	PRPSAP2
nsp7	AP/MS	5635	PRPSAP1
nsp7	AP/MS	5634	PRPS2
nsp7	AP/MS	5631	PRPS1
nsp8	Y2H	80320	SP6
nsp8	Y2H	10199	MPHOSPH10
nsp8	Y2H	167691	LCA5
nsp8	Y2H	1434	CSE1L
nsp8	Y2H	1315	COPB1
nsp8	Y2H	55038	CDCA4
nsp8	AP/MS	7408	VASP
nsp8	AP/MS	7167	TPI1
nsp8	AP/MS	6158	RPL28
nsp8	AP/MS	6137	RPL13
nsp8	AP/MS	5985	RFC5
nsp8	AP/MS	3336	HSPE1
nsp8	AP/MS	8290	H3-4
nsp8	AP/MS	3020	H3-3A
nsp8	AP/MS	8338	H2AC20
nsp8	AP/MS	396	ARHGDIA
nsp9	Y2H	84858	ZNF503
nsp9	Y2H	8887	TAX1BP1
nsp9	Y2H	6778	STAT6
nsp9	Y2H	29072	SETD2
nsp9	Y2H	53371	NUP54
nsp9	Y2H	57534	MIB1
nsp9	Y2H	27430	MAT2B
nsp9	Y2H	4107	MAGEA8
nsp9	Y2H	4000	LMNA
nsp9	Y2H	8687	KRT38
nsp9	Y2H	1967	EIF2B1
nsp9	AP/MS;Y2H	3939	LDHA
nsp9	AP/MS	5315	PKM
nsp9	AP/MS	4522	MTHFD1
nsp9	AP/MS	121457	IKBIP
nsp9	AP/MS	2107	ETF1
nsp9	AP/MS	9669	EIF5B
nsp9	AP/MS	1936	EEF1D
nsp9	AP/MS	226	ALDOA
nsp9	AP/MS	10327	AKR1A1
orf10	AP/MS;Y2H	7417	VDAC2
orf10	Y2H	28227	PPP2R3B
orf10	Y2H	6921	ELOC
orf10	Y2H	2000	ELF4
orf10	AP/MS;Y2H	25813	SAMM50
orf10	AP/MS	7419	VDAC3
orf10	AP/MS	6280	S100A9
orf10	AP/MS	4643	MYO1E
orf10	AP/MS	126353	MISP
orf10	AP/MS	1829	DSG2
orf10	AP/MS	1627	DBN1
orf10	AP/MS	1509	CTSD
orf3a	Y2H	81567	TXNDC5
orf3a	Y2H	23505	TMEM131
orf3a	Y2H	25777	SUN2
orf3a	Y2H	6472	SHMT2
orf3a	Y2H	871	SERPINH1
orf3a	Y2H	5232	PGK2
orf3a	Y2H	81562	LMAN2L
orf3a	Y2H	3162	HMOX1
orf3a	Y2H	30001	ERO1A
orf3a	Y2H	10488	CREB3
orf3a	Y2H	29880	ALG5
orf3a	Y2H	88	ACTN2
orf3a	Y2H	25870	SUMF2
orf3a	AP/MS;Y2H	27069	GHITM
orf3a	AP/MS;Y2H	10487	CAP1
orf3a	AP/MS;Y2H	10449	ACAA2
orf3a	AP/MS	163033	ZNF579
orf3a	AP/MS	23339	VPS39
orf3a	AP/MS	55823	VPS11
orf3a	AP/MS	55325	UFSP2
orf3a	AP/MS	9789	SPCS2
orf3a	AP/MS	6652	SORD
orf3a	AP/MS	5831	PYCR1
orf3a	AP/MS	29968	PSAT1
orf3a	AP/MS	29085	PHPT1
orf3a	AP/MS	5092	PCBD1
orf3a	AP/MS	54953	ODR4
orf3a	AP/MS	51079	NDUFA13
orf3a	AP/MS	4048	LTA4H
orf3a	AP/MS	3845	KRAS
orf3a	AP/MS	3105	HLA-A
orf3a	AP/MS	51031	GLOD4
orf3a	AP/MS	4072	EPCAM
orf3a	AP/MS	23333	DPY19L1
orf3a	AP/MS	5977	DPF2
orf3a	AP/MS	9377	COX5A
orf3a	AP/MS	23155	CLCC1
orf3a	AP/MS	521	ATP5ME
orf3a	AP/MS	230	ALDOC
orf3a	AP/MS	226	ALDOA
orf3a	AP/MS	38	ACAT1
orf3b	Y2H	6844	VAMP2
orf3b	Y2H	105375355	UPK3B
orf3b	Y2H	27242	TNFRSF21
orf3b	Y2H	8887	TAX1BP1
orf3b	Y2H	5464	PPA1
orf3b	Y2H	5236	PGM1
orf3b	Y2H	121441	NEDD1
orf3b	Y2H	23295	MGRN1
orf3b	Y2H	51571	CYRIB
orf3b	Y2H	57393	CLTRN
orf3b	Y2H	9069	CLDN12
orf3b	Y2H	4059	BCAM
orf3b	Y2H	558	AXL
orf3b	Y2H	51094	ADIPOR1
orf3b	Y2H	166647	ADGRA3
orf3b	Y2H	91	ACVR1B
orf3b	Y2H	81609	SNX27
orf3b	Y2H	26608	TBL2
orf3b	Y2H	10509	SEMA4B
orf3b	AP/MS	23613	ZMYND8
orf3b	AP/MS	7112	TMPO
orf3b	AP/MS	6472	SHMT2
orf3b	AP/MS	6389	SDHA
orf3b	AP/MS	51586	MED15
orf3b	AP/MS	151963	MB21D2
orf3b	AP/MS	3251	HPRT1
orf3b	AP/MS	10049	DNAJB6
orf3b	AP/MS	515	ATP5PB
orf3b	AP/MS	506	ATP5F1B
orf6	Y2H	6449	SGTA
orf6	Y2H	9810	RNF40
orf6	Y2H	92840	REEP6
orf6	Y2H	8480	RAE1
orf6	Y2H	79443	FYCO1
orf6	Y2H	6249	CLIP1
orf6	Y2H	55088	CCDC186
orf6	AP/MS;Y2H	6744	ITPRID2
orf6	AP/MS;Y2H	81	ACTN4
orf6	AP/MS	7431	VIM
orf6	AP/MS	7429	VIL1
orf6	AP/MS	7419	VDAC3
orf6	AP/MS	7417	VDAC2
orf6	AP/MS	7416	VDAC1
orf6	AP/MS	10452	TOMM40
orf6	AP/MS	83442	SH3BGRL3
orf6	AP/MS	25813	SAMM50
orf6	AP/MS	64236	PDLIM2
orf6	AP/MS	9124	PDLIM1
orf6	AP/MS	10763	NES
orf6	AP/MS	113230	MISP3
orf6	AP/MS	51474	LIMA1
orf6	AP/MS	3898	LAD1
orf6	AP/MS	3710	ITPR3
orf6	AP/MS	3709	ITPR2
orf6	AP/MS	3708	ITPR1
orf6	AP/MS	10989	IMMT
orf6	AP/MS	8139	GAN
orf6	AP/MS	2317	FLNB
orf6	AP/MS	79180	EFHD2
orf6	AP/MS	1627	DBN1
orf6	AP/MS	57482	CRACD
orf6	AP/MS	1327	COX4I1
orf6	AP/MS	54927	CHCHD3
orf6	AP/MS	83543	AIF1L
orf6	AP/MS	88	ACTN2
orf6	AP/MS	87	ACTN1
orf7a	Y2H	63892	THADA
orf7a	Y2H	9688	NUP93
orf7a	Y2H	51194	IPO11
orf7a	Y2H	83548	COG3
orf7a	Y2H	55038	CDCA4
orf7a	Y2H	146439	BICDL2
orf7a	Y2H	57130	ATP13A1
orf7a	Y2H	57510	XPO5
orf7a	AP/MS	55342	STRBP
orf7a	AP/MS	58477	SRPRB
orf7a	AP/MS	6210	RPS15A
orf7a	AP/MS	6185	RPN2
orf7a	AP/MS	6184	RPN1
orf7a	AP/MS	9761	MLEC
orf7a	AP/MS	3105	HLA-A
orf7a	AP/MS	1650	DDOST
orf7a	AP/MS	57018	CCNL1
orf7a	AP/MS	476	ATP1A1
orf7a	AP/MS	9590	AKAP12
orf7b	Y2H	7991	TUSC3
orf7b	Y2H	10959	TMED2
orf7b	Y2H	6760	SS18
orf7b	Y2H	146802	SLC47A2
orf7b	Y2H	6444	SGCD
orf7b	Y2H	55829	SELENOS
orf7b	Y2H	162427	RETREG3
orf7b	Y2H	5955	RCN2
orf7b	Y2H	56937	PMEPA1
orf7b	Y2H	123	PLIN2
orf7b	Y2H	57506	MAVS
orf7b	Y2H	4055	LTBR
orf7b	Y2H	8687	KRT38
orf7b	Y2H	2137	EXTL3
orf7b	Y2H	2135	EXTL2
orf7b	Y2H	10134	BCAP31
orf7b	Y2H	231	AKR1B1
orf7b	Y2H	2820	GPD2
orf7b	Y2H	10509	SEMA4B
orf7b	AP/MS;Y2H	29927	SEC61A1
orf7b	AP/MS;Y2H	999	CDH1
orf7b	AP/MS	7542	ZFPL1
orf7b	AP/MS	7514	XPO1
orf7b	AP/MS	143187	VTI1A
orf7b	AP/MS	11311	VPS45
orf7b	AP/MS	51337	THEM6
orf7b	AP/MS	3703	STT3A
orf7b	AP/MS	58477	SRPRB
orf7b	AP/MS	6734	SRPRA
orf7b	AP/MS	6520	SLC3A2
orf7b	AP/MS	60386	SLC25A19
orf7b	AP/MS	6510	SLC1A5
orf7b	AP/MS	6566	SLC16A1
orf7b	AP/MS	11231	SEC63
orf7b	AP/MS	10952	SEC61B
orf7b	AP/MS	6185	RPN2
orf7b	AP/MS	6184	RPN1
orf7b	AP/MS	285282	RABL3
orf7b	AP/MS	5721	PSME2
orf7b	AP/MS	10113	PREB
orf7b	AP/MS	10960	LMAN2
orf7b	AP/MS	3998	LMAN1
orf7b	AP/MS	3482	IGF2R
orf7b	AP/MS	51144	HSD17B12
orf7b	AP/MS	3163	HMOX2
orf7b	AP/MS	51495	HACD3
orf7b	AP/MS	2064	ERBB2
orf7b	AP/MS	780	DDR1
orf7b	AP/MS	1650	DDOST
orf7b	AP/MS	1374	CPT1A
orf7b	AP/MS	1312	COMT
orf7b	AP/MS	821	CANX
orf7b	AP/MS	28969	BZW2
orf7b	AP/MS	488	ATP2A2
orf7b	AP/MS	476	ATP1A1
orf7b	AP/MS	29880	ALG5
orf8	Y2H	5987	TRIM27
orf8	Y2H	26015	RPAP1
orf8	Y2H	26548	ITGB1BP2
orf8	Y2H	2243	FGA
orf8	Y2H	23065	EMC1
orf8	Y2H	1747	DLX3
orf8	AP/MS;Y2H	444	ASPH
orf8	Y2H	9510	ADAMTS1
orf8	AP/MS;Y2H	3371	TNC
orf8	AP/MS	23352	UBR4
orf8	AP/MS	8878	SQSTM1
orf8	AP/MS	23654	PLXNB2
orf8	AP/MS	4233	MET
orf8	AP/MS	3959	LGALS3BP
orf8	AP/MS	3914	LAMB3
orf8	AP/MS	56888	KCMF1
orf8	AP/MS	3688	ITGB1
orf8	AP/MS	10525	HYOU1
orf8	AP/MS	3309	HSPA5
orf8	AP/MS	7184	HSP90B1
orf8	AP/MS	2734	GLG1
orf8	AP/MS	23071	ERP44
orf8	AP/MS	5611	DNAJC3
orf8	AP/MS	51726	DNAJB11
orf8	AP/MS	66005	CHID1
orf8	AP/MS	57214	CEMIP
orf8	AP/MS	57003	CCDC47
orf8	AP/MS	821	CANX
orf8	AP/MS	811	CALR
orf8	AP/MS	213	ALB
orf9b	Y2H	84767	TRIM51
orf9b	Y2H	10607	TBL3
orf9b	Y2H	5708	PSMD2
orf9b	Y2H	8359	H4C1
orf9b	AP/MS	23160	WDR43
orf9b	AP/MS	134430	WDR36
orf9b	AP/MS	84916	UTP4
orf9b	AP/MS	9868	TOMM70
orf9b	AP/MS	10953	TOMM34
orf9b	AP/MS	8467	SMARCA5
orf9b	AP/MS	83443	SF3B5
orf9b	AP/MS	26156	RSL1D1
orf9b	AP/MS	6141	RPL18
orf9b	AP/MS	6138	RPL15
orf9b	AP/MS	55131	RBM28
orf9b	AP/MS	22913	RALY
orf9b	AP/MS	5885	RAD21
orf9b	AP/MS	9933	PUM3
orf9b	AP/MS	5713	PSMD7
orf9b	AP/MS	5709	PSMD3
orf9b	AP/MS	27043	PELP1
orf9b	AP/MS	1728	NQO1
orf9b	AP/MS	51602	NOP58
orf9b	AP/MS	9221	NOLC1
orf9b	AP/MS	84365	NIFK
orf9b	AP/MS	55506	MACROH2A2
orf9b	AP/MS	9555	MACROH2A1
orf9b	AP/MS	221092	HNRNPUL2
orf9b	AP/MS	3189	HNRNPH3
orf9b	AP/MS	10949	HNRNPA0
orf9b	AP/MS	333932	H3C15
orf9b	AP/MS	8350	H3C1
orf9b	AP/MS	3020	H3-3A
orf9b	AP/MS	440686	H3-2
orf9b	AP/MS	128312	H2BU1
orf9b	AP/MS	8342	H2BC14
orf9b	AP/MS	94239	H2AZ2
orf9b	AP/MS	3014	H2AX
orf9b	AP/MS	3013	H2AC7
orf9b	AP/MS	8338	H2AC20
orf9b	AP/MS	3008	H1-4
orf9b	AP/MS	3007	H1-3
orf9b	AP/MS	3006	H1-2
orf9b	AP/MS	54433	GAR1
orf9b	AP/MS	117246	FTSJ3
orf9b	AP/MS	2091	FBL
orf9b	AP/MS	9521	EEF1E1
orf9b	AP/MS	1841	DTYMK
orf9b	AP/MS	1736	DKC1
orf9b	AP/MS	51202	DDX47
orf9b	AP/MS	1211	CLTA
orf9b	AP/MS	25978	CHMP2B
orf9b	AP/MS	23468	CBX5
orf9b	AP/MS	353	APRT
orf9c	Y2H	79084	WDR77
orf9c	Y2H	162427	RETREG3
orf9c	Y2H	27069	GHITM
orf9c	Y2H	10488	CREB3
orf9c	AP/MS	7431	VIM
orf9c	AP/MS	23650	TRIM29
orf9c	AP/MS	7157	TP53
orf9c	AP/MS	29766	TMOD3
orf9c	AP/MS	6742	SSBP1
orf9c	AP/MS	6223	RPS19
orf9c	AP/MS	5493	PPL
orf9c	AP/MS	5339	PLEC
orf9c	AP/MS	10398	MYL9
orf9c	AP/MS	140465	MYL6B
orf9c	AP/MS	4637	MYL6
orf9c	AP/MS	4634	MYL3
orf9c	AP/MS	103910	MYL12B
orf9c	AP/MS	10627	MYL12A
orf9c	AP/MS	4627	MYH9
orf9c	AP/MS	57644	MYH7B
orf9c	AP/MS	79784	MYH14
orf9c	AP/MS	4629	MYH11
orf9c	AP/MS	4628	MYH10
orf9c	AP/MS	10903	MTMR11
orf9c	AP/MS	9643	MORF4L2
orf9c	AP/MS	3150	HMGN1
orf9c	AP/MS	3159	HMGA1
orf9c	AP/MS	83481	EPPK1
orf9c	AP/MS	28974	C19orf53
orf9c	AP/MS	8815	BANF1
S	Y2H	84445	LZTS2
S	Y2H	26548	ITGB1BP2
S	Y2H	146439	BICDL2
S	Y2H	81	ACTN4
S	AP/MS;Y2H	85439	STON2
S	AP/MS	7171	TPM4
S	AP/MS	7170	TPM3
S	AP/MS	7169	TPM2
S	AP/MS	7168	TPM1
S	AP/MS	29766	TMOD3
S	AP/MS	23384	SPECC1L
S	AP/MS	142	PARP1
S	AP/MS	10398	MYL9
S	AP/MS	140465	MYL6B
S	AP/MS	4637	MYL6
S	AP/MS	103910	MYL12B
S	AP/MS	4627	MYH9
S	AP/MS	79784	MYH14
S	AP/MS	4628	MYH10
S	AP/MS	4008	LMO7
S	AP/MS	83481	EPPK1
S	AP/MS	23603	CORO1C
S_active	Y2H	10782	ZNF274
S_active	Y2H	25921	ZDHHC5
S_active	Y2H	2000	ELF4
S_active	Y2H	81	ACTN4
S_active	AP/MS;Y2H	85439	STON2
S_active_RBD1	Y2H	81	ACTN4
S_active_RBD1	AP/MS;Y2H	85439	STON2
S_D614G_MU	Y2H	140465	MYL6B

## Sheet: S2
Table S2. Interactome comparisons.
Overlap among interactomes		This study	Gordon et al.	Stukalov et al.	Li et al.
Overlap	This study	578	67	120	73
	Gordon et al.	67	383	63	48
	Stukalov et al.	120	63	876	46
	Li et al.	73	48	46	284
Jaccard index	This study		0.0749441	0.089955	0.0925222
	Gordon et al.	0.0749441		0.0526756	0.0775444
	Stukalov et al.	0.089955	0.0526756		0.0412926
	Li et al.	0.0925222	0.0775444	0.0412926
Fisher's exact test P	This study		<0.001	<0.001	<0.001
	Gordon et al.	<0.001		<0.001	<0.001
	Stukalov et al.	<0.001	<0.001		<0.001
	Li et al.	<0.001	<0.001	<0.001
Overlap with DEGs from bulk RNA-Seq		SARS2-DEG	SARS2-DEP	DE-NS2_all	DE-PBMC_all
Overlap	This study	5	41	39	126
	Gordon et al.	1	16	15	90
	Stukalov et al.	10	27	59	187
	Li et al.	0	15	13	57
Jaccard index	This study	0.00610501	0.0493976	0.0219224	0.0312345
	Gordon et al.	0.00159236	0.0242424	0.00932836	0.0232258
	Stukalov et al.	0.00899281	0.0236427	0.0286826	0.0437837
	Li et al.	0	0.0266904	0.00860357	0.0149646
Fisher's exact test P	This study	0.563583	<0.001	0.478737	0.00759986
	Gordon et al.	0.0962322	0.00014012	0.0828498	0.00274165
	Stukalov et al.	1	0.00019648	0.38497	0.00269399
	Li et al.	0.0534112	1.609e-05	0.378883	0.270522
Overlap with DEGs from single-cell RNA-Seq		CD8	Epi-Ciliated	Epi-Secretory	Epi-Squamous	Macro	Mono	NK
Overlap	This study	22	6	28	12	32	18	0
	Gordon et al.	0	0	5	3	9	3	0
	Stukalov et al.	12	9	31	17	12	4	3
	Li et al.	1	3	8	3	2	0	0
Jaccard index	This study	0.03207	0.00864553	0.030871	0.0159362	0.0377359	0.026393	0
	Gordon et al.	0	0	0.00680272	0.00529101	0.0133136	0.0059761	0
	Stukalov et al.	0.0120724	0.0091001	0.0257904	0.0162524	0.0102916	0.00402414	0.00335946
	Li et al.	0.00242131	0.00744417	0.0126382	0.00641026	0.00342466	0	0
Fisher's exact test P	This study	<0.001	0.161859	1.25e-06	0.00703396	<0.001	1e-08	1
	Gordon et al.	0.182617	0.178421	0.692004	1	0.191412	0.499568	1
	Stukalov et al.	0.0133082	0.109201	0.00018328	0.00313692	1	0.821222	0.0518074
	Li et al.	1	0.240178	0.165208	0.746846	0.450718	0.421	1

## Sheet: S3
Table S3. Tissue-specificity of the host factors.
	MYL6B	ZNF274	ZDHHC5	LZTS2	ITGB1BP2	ELF4	BICDL2	ACTN4	WDR77	RETREG3	GHITM	CREB3	TBL3	PSMD2	TRIM27	RPAP1	FGA	EMC1	DLX3	ASPH	ADAMTS1	TUSC3	TMED2	SS18	SLC47A2	SGCD	SELENOS	RCN2	PMEPA1	PLIN2	MAVS	LTBR	EXTL3	EXTL2	BCAP31	AKR1B1	GPD2	SEMA4B	THADA	NUP93	IPO11	COG3	CDCA4	ATP13A1	XPO5	SGTA	RNF40	REEP6	RAE1
Adipose - Subcutaneous	-0.392965	-0.0487254	0.0689226	0.520904	-0.468433	0.898918	-0.561133	0.217889	-0.0521346	-0.245485	-0.08667	-0.171822	-0.0636737	0.152891	-0.254268	0.14919	-0.177636	0.215127	-0.203556	2.92564	0.466145	0.0483742	0.346696	0.136844	-0.211262	-0.422846	0.307671	-0.192306	-0.106879	3.65514	0.463074	0.646803	-0.821269	-0.533849	1.90119	-0.161492	0.477134	-0.955511	0.473446	0.441034	1.12443	0.090488	-0.0692761	-0.176592	-0.00901965	-0.271789	0.261024	-0.27735	-0.0405712
Adipose - Visceral (Omentum)	-0.333647	-0.246121	0.205323	0.16913	-0.463664	0.595899	-0.559813	-0.0529839	-0.123295	-0.628492	-0.296831	-0.415201	-0.395034	-0.348747	-0.210121	-0.378493	-0.177585	0.179019	-0.203909	1.4885	1.23856	0.208136	0.1809	-0.124612	-0.199574	-0.600401	0.50128	-0.2417	-0.0500313	2.88195	-0.198107	0.522731	-0.210778	-0.143527	1.7137	-0.180231	0.0291791	-1.03836	-0.134883	-0.327525	0.703392	-0.4792	-0.23784	-0.49989	-0.210353	-0.794837	-0.297311	-0.299449	-0.271093
Adrenal Gland	-0.323475	-0.736021	-0.389046	-0.216055	-0.482471	-0.942373	-0.561596	-0.130809	0.612258	-0.171889	2.40899	0.225818	-0.596176	0.620058	-0.438081	-0.229366	-0.177269	-0.423841	-0.206477	2.06836	-0.621578	2.35816	-0.134327	0.769165	-0.136986	-0.424581	0.284341	-0.66382	-0.66351	0.00604134	-0.552222	0.0552052	1.16693	1.84272	0.97217	5.63625	-1.06146	0.202333	-0.620914	-0.367454	-0.431194	0.0832257	-0.582099	-0.244815	-0.20191	-0.868168	0.0715765	0.620423	-0.290251
Artery - Aorta	-0.267262	-0.036762	0.283057	1.34063	0.707153	-0.128035	-0.559562	2.6709	0.487043	-0.418493	0.424587	1.6522	0.0194571	0.316929	0.488608	0.0306521	-0.177563	1.3151	-0.168005	0.772562	1.41488	-0.893771	1.36449	1.03971	-0.191437	2.40829	1.64765	2.32222	3.11864	-0.402555	0.0451931	0.0770588	1.52502	1.52358	0.331755	-0.174438	-0.564159	-1.06232	0.499879	0.11169	-0.184301	0.185705	-0.206915	0.0026228	-0.0161637	0.011799	0.425808	-0.32057	-0.26544
Artery - Coronary	-0.358381	-0.104953	-0.0553781	0.742919	0.427733	0.0134403	-0.559949	1.17378	0.774422	-0.510199	0.313444	1.09765	-0.0939031	0.174057	0.270681	-0.0356269	-0.177526	0.923084	-0.195584	0.602247	1.37127	-0.329128	1.04081	0.755372	-0.204641	1.00471	1.02552	1.17642	0.956108	0.177625	0.225965	0.581947	1.03663	0.647094	0.264343	-0.17887	-0.26297	-0.697117	0.267381	-0.00153072	0.245043	0.105013	-0.235517	-0.0187607	0.0202061	0.00174035	0.15093	-0.320823	-0.22367
Artery - Tibial	-0.409454	-0.0894009	0.0593892	1.79135	0.136664	0.104246	-0.561326	3.54467	0.166821	-0.720969	1.05507	1.45379	-0.00670296	0.521787	-0.183633	0.419404	-0.177646	0.725785	0.194781	1.02935	1.96204	-0.684405	1.1433	0.978267	-0.204509	3.47131	0.855246	1.24791	2.68542	-0.404905	0.326876	-0.0618172	1.72639	0.355248	-0.114849	-0.217953	-0.145451	-0.515302	0.508441	0.369752	0.24095	0.318041	-0.245371	-0.10735	0.146851	0.122768	0.612039	-0.331511	-0.105896
Bladder	-0.324225	0.463307	0.77806	1.0878	-0.0533998	0.392214	-0.218876	0.0132182	2.38785	0.240018	-0.125065	0.237557	0.265362	-0.0787271	0.557236	0.926693	-0.177536	0.264129	-0.18621	0.653605	0.25155	0.17657	0.406396	0.294219	-0.20991	-0.240661	-0.247412	0.0962564	-0.536511	0.21066	0.570795	1.04722	0.72227	0.097293	0.142159	-0.112317	-0.393889	0.345412	0.638	0.00610663	0.296621	0.443921	-0.0405945	0.10394	0.274146	0.501751	0.273893	-0.280037	0.191207
Brain	0.817701	-1.41476	-1.85682	-1.01423	-0.512534	-1.41786	-0.558863	-0.950654	-1.69362	-1.14559	0.24979	-0.310046	-1.00654	-0.90708	-1.42015	-1.19959	-0.17765	-0.787749	-0.224832	-0.672483	-0.792658	0.154345	-2.02515	-1.41277	-0.177218	-0.702074	-1.66435	0.187245	-0.436341	-0.794527	-1.74334	-2.18785	0.116336	0.149072	-1.04313	-0.193355	0.683457	-0.904235	-1.64677	-0.157225	-0.977845	-1.5867	-0.901521	-1.17551	-0.968925	-0.110851	-1.09263	-0.201216	-0.414305
Breast - Mammary Tissue	-0.282038	0.307783	0.093856	0.371314	-0.463933	0.347062	0.129661	0.0940757	0.00807813	-0.246255	-0.399891	-0.177774	0.175836	-0.250173	0.108541	0.14664	-0.177578	0.328606	-0.180384	1.18035	0.225823	0.335688	0.379064	0.173209	-0.197478	-0.512119	0.202554	-0.122115	-0.229873	2.05892	0.20925	0.559388	-0.793933	-0.405248	1.07329	-0.188755	0.651551	-0.092558	0.480147	0.141971	0.911574	0.17118	0.0108399	-0.000941122	0.120873	-0.122532	0.248156	-0.164705	0.00151321
Cervix	0.324419	0.623616	0.432658	1.26627	-0.272834	0.620983	-0.546936	0.19161	0.399461	1.27653	-0.327143	0.746801	0.768797	0.34641	2.25489	0.901201	-0.177097	1.36282	-0.208945	0.172509	-0.0659513	0.449068	1.06059	1.05852	-0.1867	-0.14775	0.147314	0.503104	2.60088	-0.183768	0.848144	1.16847	0.403357	1.28727	0.900545	-0.149137	0.32186	0.431841	1.55719	0.242998	0.78994	2.11103	0.437057	1.25356	0.588486	0.929404	0.802917	-0.270439	0.380273
Colon	-0.35549	-0.0271913	-0.197279	0.716622	-0.0252238	-0.110476	-0.50746	-0.211161	-0.141085	-0.230072	0.590291	0.459773	-0.33225	0.101185	-0.548047	0.411756	-0.177571	-0.189789	-0.212916	-0.264692	-0.407861	-0.280169	-0.0787618	-0.194835	-0.202941	0.163386	-0.386853	-0.124715	-0.30257	-0.546728	0.636418	0.590406	0.117247	0.251689	-0.464549	-0.216056	-0.610422	1.05521	-0.365706	-0.236145	-0.162079	-0.167728	-0.0748842	-0.239724	-0.329854	0.227897	-0.315898	-0.314369	-0.122856
Esophagus	-0.398747	-0.036762	0.371791	0.483399	0.0547243	-0.279043	-0.550588	0.236082	0.358407	0.0149913	0.242717	0.257067	0.0758465	0.449217	-0.645171	0.370969	-0.177502	-0.169156	-0.195531	-0.334047	-0.36651	-0.355862	0.0589814	-0.0230391	-0.194689	0.294486	-0.342876	0.0364642	-0.361742	-0.60639	0.562128	0.567848	0.858947	0.00126609	0.177972	-0.221933	-0.369215	1.25718	-0.364589	0.0583622	-0.0654739	-0.429171	-0.0279362	-0.419447	0.0896986	0.368069	-0.0327987	-0.313321	-0.0305212
Heart - Atrial Appendage	-0.370051	-0.997421	-1.17188	-1.02544	4.50295	-1.02104	-0.561829	-0.885715	-0.836269	-1.61052	0.891387	-1.12351	-1.16635	-0.668053	-1.56343	-1.46496	-0.177609	-0.96274	-0.216534	-0.678189	-0.307277	-0.389232	-1.32169	-1.26323	-0.216865	1.1816	-1.15271	-0.924111	-0.475648	-0.223638	-1.38179	-1.54758	0.2357	-0.966347	-1.4831	-0.156648	-1.25811	-1.00343	-1.25623	-1.00551	-0.662182	-1.40264	-0.80426	-1.55176	-1.15844	-0.495675	-1.43543	-0.328932	-0.770578
Heart - Left Ventricle	-0.466524	-1.15947	-1.50739	-1.32333	2.71581	-1.21123	-0.562499	-1.02386	-0.906061	-1.72908	1.57542	-1.46031	-1.21646	-0.722329	-1.89124	-1.46343	-0.177647	-1.41073	-0.225198	-1.09138	-0.68671	-0.311734	-1.98577	-1.6783	-0.21784	1.0915	-1.40719	-1.21449	-0.58125	-0.579763	-1.20164	-1.94503	-0.26636	-1.31769	-2.01187	-0.140913	-1.55781	-1.22107	-1.64882	-1.20756	-0.883111	-1.83701	-0.902402	-1.78417	-1.29073	-1.08556	-1.74784	-0.324333	-0.845513
Kidney	-0.383971	-1.12938	-1.00248	-0.981467	-0.483288	-0.930132	-0.417423	-0.54672	-1.25776	-1.20724	-0.0846492	-0.812676	-0.994623	-1.26101	-1.22872	-1.57763	-0.175811	-1.45173	-0.216687	-1.24594	-0.498029	-0.351868	-1.72449	-0.933432	5.63473	-0.87796	-1.1763	-0.876537	-0.586279	-0.371442	-1.17378	-0.893099	-1.75231	-0.86034	-1.14267	-0.219905	-1.27576	-0.309304	-1.29533	-1.11565	-1.07199	-1.45945	-0.813393	-1.0915	-1.02062	-1.10633	-1.25098	-0.205458	-0.671271
Liver	-0.671706	-1.01596	-1.31892	-1.69306	-0.469518	-1.36093	-0.535947	-0.995757	-1.52529	-0.769904	-0.644405	-1.42063	-1.18001	-1.72409	-0.517144	-1.68164	5.65684	-1.5852	-0.22758	-1.19848	-0.775999	-0.895703	0.202119	-1.02811	-0.211012	-0.881325	-1.00978	-1.51027	-0.764937	0.785215	-1.65171	0.108641	-2.00043	-0.819858	-1.55083	-0.315304	-1.7569	-0.647409	-1.55798	-1.53985	-1.40274	-0.148362	-0.864908	-1.32392	-1.18468	-1.43729	-1.74748	1.74073	-0.760057
Lung	-0.38729	0.489627	0.640559	0.201031	-0.377573	1.65797	-0.054861	0.437468	0.276299	0.226146	-0.305925	0.00657849	0.0380598	0.273689	0.78038	0.0115332	-0.175966	0.42919	-0.209294	0.0693538	0.201979	0.185589	0.585858	0.152519	-0.199376	-0.00747425	0.836207	0.22299	-0.192573	0.329416	0.774473	1.23191	0.0397965	-0.0860996	0.582444	-0.137083	0.957845	-0.157044	0.420952	0.277032	-0.103718	0.238962	-0.0844981	0.324903	0.0169588	0.0581984	0.335374	-0.320054	-0.232463
Minor Salivary Gland	-0.435473	-0.529653	0.517358	-0.523642	-0.465989	-0.621093	2.36257	-0.175028	0.184611	0.238477	-0.65552	-0.171988	0.192113	-0.428876	0.064394	-0.313489	-0.177488	-0.472198	-0.180284	0.158462	-0.661422	-0.402792	1.17567	-0.191386	-0.172836	-0.661405	0.36452	-0.516614	-0.0773984	-0.517751	-0.293445	0.221856	-0.711016	-0.747462	-0.0505973	-0.23441	1.87779	0.6459	-0.0838791	-0.551688	-0.314706	0.32611	-0.0604633	-0.0905483	-0.146056	-0.923977	0.0822999	-0.231532	-0.33893
Muscle - Skeletal	3.81348	-1.14098	-0.862416	-1.40394	0.227165	-1.33329	-0.562433	-1.08392	0.562309	-1.19183	1.6997	-1.47899	-0.143898	2.85913	-1.66698	0.452543	-0.17765	-0.5065	-0.225383	-0.411303	-0.633123	-0.883077	-1.49827	-1.92339	-0.189622	1.58664	-1.18757	-0.754223	-0.670262	0.629295	0.64137	-1.88624	-0.967057	-1.49167	-2.16734	-0.0398401	0.30697	-1.53383	-1.40404	-0.772099	-0.664053	-1.53353	-0.958403	-1.53241	-0.719921	0.197397	-1.58842	-0.332143	-0.698909
Nerve - Tibial	-0.186958	1.11411	0.130523	0.677823	-0.366123	-0.181716	-0.559723	0.383647	0.179137	0.248495	-0.464556	0.438279	0.619976	0.476431	0.799644	1.57164	-0.177639	1.19002	-0.209689	1.05481	0.731566	-0.431041	0.329433	1.56074	-0.193764	0.337635	1.36206	0.721475	0.101703	-0.40818	1.76934	0.717298	0.5291	0.793959	0.373888	0.192048	2.45953	1.53124	1.28877	0.900882	1.218	0.986174	-0.126479	0.681804	0.597578	1.19936	0.946612	-0.249289	0.396604
Ovary	0.387592	2.64902	0.017589	1.18587	-0.322963	1.33187	-0.558537	-0.241483	-0.118505	0.63497	-0.492847	0.170925	0.438018	0.0983126	1.28486	1.45947	-0.177284	1.71873	-0.19151	0.0987639	3.89654	2.13011	1.07497	1.84258	-0.197321	0.49775	-0.0393231	0.895003	-0.407072	-0.445842	1.95754	0.120766	0.989246	1.42943	0.0947599	-0.131469	0.486705	0.127099	1.04752	0.290296	0.523281	1.49131	0.170591	1.51271	0.125419	1.61761	1.50137	-0.2265	0.433977
Pancreas	-0.696761	-1.68992	-1.60089	-1.52346	-0.513276	-1.28839	2.81932	-0.942644	-1.8681	-0.622327	-2.73622	-1.25694	-1.0291	-1.86273	-0.61507	-1.53532	-0.176071	-1.76651	-0.218193	-1.24712	-0.795168	-0.42943	0.197804	-1.58331	-0.213192	-0.903825	-0.585825	-1.33908	-0.459904	-0.77472	-1.48023	-0.983333	-1.70366	-1.13336	-1.60508	-0.291659	-1.28618	-0.853183	-1.32474	-1.33686	-1.31783	-0.805198	-0.802418	-1.17754	-0.521445	-1.7556	-1.52658	-0.193856	-0.915329
Pituitary	0.893401	0.748036	-0.206812	-0.196871	-0.462629	-0.647984	-0.426702	-0.594729	-0.0548716	0.43576	0.0972209	1.27853	0.0305024	0.146844	1.29489	0.205272	-0.177369	0.723206	-0.197118	-0.529822	-0.62139	3.83628	0.349573	0.278544	-0.184257	-0.624208	-0.138541	0.338025	-0.430213	-0.709511	0.127531	-0.984179	0.42887	1.50945	0.0284012	-0.104055	-0.140771	-0.198244	0.361013	-0.349767	-0.787324	1.1056	-0.644028	0.970482	0.327402	1.30839	0.169517	-0.237146	0.0517632
Prostate	-0.0933768	0.600886	0.379858	0.714467	-0.117518	-0.327205	1.2512	-0.288481	0.796318	1.17789	-1.18395	1.28514	0.375815	-0.262873	1.15523	0.768643	-0.177469	0.145491	-0.175762	-0.555281	-0.26624	0.320227	0.299942	0.572603	-0.187311	-0.442023	0.170911	-0.0870198	1.43435	-0.608954	0.834524	1.05004	0.0826219	0.387257	0.614043	-0.222834	0.177221	0.762782	0.920571	0.0237931	-0.0535444	1.11528	-0.0869016	0.748501	0.284537	1.06503	0.218845	-0.0565001	-0.0204712
Skin	-0.373692	0.3676	2.58427	-0.305939	-0.455211	0.340038	1.9859	0.172406	-1.04017	1.13473	-0.73332	-0.946932	1.08272	0.591333	-0.864301	0.615692	-0.177641	0.0268537	5.63335	-0.578107	-0.645296	-0.59164	0.183418	0.751923	0.307799	-0.694304	-0.255993	-0.528962	-0.392596	-0.253541	-0.0482885	0.711659	-0.258159	-1.07292	0.879478	-0.26587	1.51726	1.34764	0.820424	0.297934	-0.0832512	0.332565	3.97418	0.149762	0.961277	-0.524877	0.496226	-0.244714	0.558032
Small Intestine	-0.479693	0.121155	-0.045478	-0.634434	-0.35318	1.06146	0.180082	-0.171238	0.154505	-0.152237	-0.228125	-0.70719	-0.281093	-0.436737	-0.148315	-0.0190571	-0.17732	-0.349434	-0.212157	-0.792142	-0.483032	-0.656189	-0.316486	-0.279479	-0.175196	-0.628506	0.396699	-0.46787	-0.548346	-0.282589	0.671086	-0.172918	-1.18574	-0.840193	-0.403457	-0.191853	0.0100358	0.433633	-0.282312	-0.0544562	-0.480666	0.176022	-0.0109516	0.512773	-0.342843	-0.748762	-0.195795	0.182698	-0.158031
Spleen	-0.432582	0.876044	-0.235412	-0.430957	-0.36911	1.77988	-0.54919	-0.302631	1.54077	1.32122	-0.86467	-0.577895	0.0572438	-0.124083	1.74279	0.233313	-0.177238	-0.223575	-0.225397	-0.961843	-0.756987	-0.696001	-0.898388	-0.0744525	-0.20852	-0.773493	0.290509	-0.434075	-0.621297	-0.452891	0.333067	-0.239466	-0.105081	-0.638725	0.0684271	-0.156235	-0.303915	0.460054	0.205766	0.723213	0.244225	0.12922	0.378252	2.36907	0.00526852	0.395324	-0.247983	-0.321971	0.252135
Stomach	-0.541795	-0.827541	-0.640948	-0.699099	-0.418891	0.0420365	0.691066	-0.53914	0.142188	-0.304824	-0.119002	-0.389408	-0.490373	-0.80019	-0.609853	-0.50009	-0.164471	-0.707411	-0.221677	-0.0302893	-0.532979	-0.660376	-0.0395607	-0.732167	-0.209215	-0.682566	-0.288708	-0.596294	-0.600291	-0.598986	-0.355354	-0.0677388	-0.921498	-0.724961	-0.80161	-0.229875	-0.372831	-0.39842	-0.769273	-0.632215	-0.747793	-0.421102	-0.420184	-0.477488	-0.319463	-0.704634	-0.708377	-0.305886	-0.49973
Testis	3.50725	1.23853	1.61846	-0.261967	-0.305889	-0.941571	-0.548436	-0.995277	0.736105	3.42584	2.19681	2.52849	4.31261	2.89542	-0.604234	1.47987	-0.172281	0.790262	-0.129233	-1.37288	-0.753975	0.255163	-1.01923	0.300489	-0.134098	-0.747372	3.13082	3.00008	-0.673389	-0.527505	-1.52542	-1.5645	0.718626	0.696049	0.506605	-0.166749	0.143188	-0.852064	0.765697	3.57797	3.86587	-0.156431	2.5369	1.06467	4.41642	2.26039	2.66666	5.23013	5.18166
Thyroid	0.0556678	2.35352	1.46446	0.766198	-0.408039	-0.600323	0.135593	-0.132325	0.513044	0.243871	-0.169522	0.416123	0.583933	0.206109	0.945731	0.74825	-0.177538	0.565882	0.00437384	0.611465	-0.14062	-0.666883	0.995851	1.11432	-0.161084	0.0354268	0.471782	0.513502	-0.393441	-0.508567	1.31493	1.26152	-0.433106	0.876806	0.942677	-0.181019	1.18331	1.19583	1.70984	2.47927	0.644915	0.853838	-0.0763263	1.70567	0.996348	1.40962	1.39271	-0.242053	0.0680944
Uterus	0.0446394	0.468092	0.541558	1.9155	0.729056	1.00377	-0.55745	1.53587	1.21712	0.993703	-0.0422129	1.11898	1.02342	1.04943	1.36433	1.47859	-0.177207	1.76902	-0.221225	0.174703	0.219235	0.599811	1.03541	1.06322	-0.190892	0.264646	-0.0259153	0.939847	0.370937	-0.354996	1.05182	1.26293	2.42891	1.9218	0.880532	-0.159314	-0.124287	-0.199363	1.49577	0.667474	0.782922	1.51552	0.684616	1.20596	0.60732	1.36095	1.40486	-0.286416	0.514063
Vagina	-0.153873	0.289838	2.0482	0.0822637	-0.35791	0.483019	2.62421	0.453892	0.685472	0.80952	-0.305925	-0.386763	0.347911	0.127189	0.149478	0.437248	-0.177498	0.674203	0.0833653	-0.0193154	-0.303952	-0.164857	0.70454	0.529654	-0.139767	-0.436567	-0.0133119	0.150849	0.074336	-0.421351	0.0185725	0.966852	-0.367501	-0.115473	0.589817	-0.205203	1.57256	3.30999	0.724372	0.394272	0.356034	0.836086	1.74775	0.340941	0.409884	-0.0446591	0.493366	-0.239974	0.22858
Whole Blood	-0.724718	-1.48014	-1.14475	-1.7996	-0.511653	2.66987	-0.53847	-0.860953	-2.56506	-0.51675	-1.47899	-1.56563	-1.41144	-1.53073	0.14707	-2.41989	-0.177483	-2.33997	-0.226596	-1.07738	-0.862837	-0.983364	-2.0737	-1.92941	-0.223012	-0.92593	-2.07243	-1.75717	-0.780016	0.244834	-1.77677	-0.936806	-0.628099	-1.87228	-0.199115	-0.28352	-1.37148	-0.467385	-1.42972	-1.34852	-1.55338	-2.18875	-0.662615	-1.03499	-1.54825	-2.04016	-0.366656	-0.333432	-0.582015
[truncated: 519 more columns]

## Sheet: S4
Table S4. Nonsynonymous and synonymous substitution rate ratio (dN/dS ratio) and evolutionary ratio of the host factors.
Entrez ID	dN/dS	Evolutionary ratio
140465	0.103546	0.650315
10782	0.490978	1.951
25921	0.0360843	0.275927
84445	0.0668207	0.673114
26548	0.156578	0.481424
2000	0.26559	0.971616
146439	0.0632761	1.2502
81	0.00686349	0.381474
79084	0.153385	0.928639
162427	0.160289	0.734214
27069	0.138294	0.740342
10488	0.395695	2.06226
84767	N/A	N/A
10607	0.0657867	1.22045
5708	0.0149077	0.563751
8359	N/A	N/A
5987	0.0114496	0.100226
26015	0.269786	1.45469
2243	0.261307	2.19737
23065	0.0678442	N/A
1747	0.0168622	0.204752
444	0.152683	1.09586
9510	0.144761	0.97209
7991	0.0296749	0.677496
10959	0.0113857	0.418415
6760	0.0519667	0.260315
146802	N/A	1.46499
6444	0.0786744	0.339692
55829	N/A	N/A
5955	0.0788669	0.850797
56937	0.0443494	0.949849
123	0.170942	0.994391
57506	0.659694	3.63237
4055	0.349936	2.421
8687	N/A	1.73533
2137	0.0171879	0.518842
2135	0.096853	0.872069
10134	0.132938	0.974886
231	0.107783	0.84508
2820	0.0545593	0.665433
10509	0.110635	1.30743
63892	0.24409	1.28915
9688	0.0248092	0.516551
51194	0.0390755	0.823888
83548	0.0488986	0.706842
55038	0.157562	1.81612
57130	0.0350371	0.842519
57510	0.152377	0.773265
6449	0.0272182	0.77405
9810	0.0525192	0.512977
92840	0.154481	1.70973
8480	0.00909091	0.512728
79443	0.160779	1.44956
6249	0.10664	0.61128
55088	0.108847	N/A
6744	0.16995	1.1212
6844	0.0130092	0.374257
105375355	N/A	N/A
27242	0.1158	0.752031
8887	0.126079	0.844701
5464	0.0507322	0.674423
5236	0.0866635	0.742007
121441	0.173675	1.03092
23295	0.0771034	0.827787
51571	0.00545171	0.162531
57393	0.193366	1.03979
9069	0.105932	0.49688
4059	0.157329	1.77619
558	0.121268	1.05672
51094	0.0500547	0.436681
166647	0.0589102	0.557298
91	0.0191327	0.212721
81609	0.0417423	0.438741
26608	N/A	1.10203
81567	0.138829	N/A
23505	0.11318	0.610456
25777	0.117717	1.2548
6472	0.0551676	2.51477
871	0.0227117	0.437117
5232	0.141933	0.773013
81562	0.12108	0.481766
3162	0.10653	1.23757
30001	0.0671043	0.534511
29880	0.128374	0.82671
88	0.00497213	0.17526
25870	0.346874	2.05454
7417	0.122568	0.61303
28227	0.0199654	1.25951
6921	0	0.329523
84858	0.0316942	0.464095
6778	0.129839	0.775598
29072	0.180539	0.702705
53371	0.0314815	0.434294
57534	0.00711111	0.129025
27430	0.0621209	0.657876
4107	0.421135	2.92396
4000	0.0191675	0.355376
1967	0.0624888	0.705041
80320	0.0377283	0.362608
10199	0.164206	1.32446
167691	0.213212	1.63187
1434	0.00876712	0.647936
1315	0.00953545	0.462349
6386	0.104351	0.548625
949	0.0948336	1.38342
4218	0.0421	0.510535
80142	0.0698981	1.1306
222484	0.0525651	0.670909
595	0.0330758	0.438177
80727	0.024591	0.679069
90407	0.095309	0.829016
201799	0.363402	2.3452
57151	0.364473	2.05542
3768	N/A	0.409361
2823	0.0148275	0.192366
65056	0.0635606	0.395372
51234	0.00835841	N/A
1718	0.0215783	0.687795
1266	0.0178108	0.202356
130162	0.406672	N/A
857	0.0798643	0.4686
11194	0.136898	1.04337
54812	0.314622	1.07943
2876	N/A	0.731584
1958	0.0486939	0.541707
55254	0.0678592	0.261969
166	0.0108502	1.10312
6003	0.179853	0.938393
25898	0.103244	0.783436
51422	0.0730072	0.433358
26128	0.0594356	0.905548
253980	0.0467305	0.308041
374875	N/A	1.34944
64395	0.0812688	N/A
9513	0.0237288	0.285536
2274	0.0376749	0.965346
83706	0.0264463	0.641227
2207	0.199016	0.939121
23197	0.0233853	0.43812
1406	0.0247163	0.313735
285753	0.29002	1.39406
222389	0.213125	1.17834
539	0.118401	0.900844
57016	0.133358	1.1567
85464	0.252096	1.06329
23325	0.0333191	0.356641
5910	0.0519983	0.31905
8826	0.0392949	0.338346
2115	0.0358897	0.386458
56159	0.873614	2.48484
6925	0.0269831	0.218614
5966	0.270991	1.26621
5015	0.0142285	0.0951887
388324	0.523789	2.30717
26576	0.0322283	0.616488
10432	0.0427308	1.79018
4001	0.0294957	0.338184
84643	0.146582	1.58877
8894	0.0638446	N/A
283638	0.114943	N/A
10973	0.0838791	0.773651
382	0	0.12301
87	0.00658228	0.219442
58500	0.076005	0.995651
83637	0.103417	0.743877
2547	0.137921	1.22362
200734	0.0433613	0.659491
5522	0.0376841	0.329897
4223	0.0151955	0.240625
2801	N/A	1.81962
10094	0.0100735	0.492168
51270	0.190259	3.66439
5962	0.0121845	0.164969
8045	0.26161	1.88966
152789	0.032086	0.672061
64689	0.179054	1.19155
79745	0.090604	0.786923
9659	N/A	N/A
10142	0.21345	1.24713
159195	0.301101	1.06412
9898	0.048294	0.255848
6938	0.0644863	0.357233
8737	0.324964	1.97126
55285	0.210886	0.836615
54477	0.144804	0.784815
8573	0.00572917	0.191613
4641	0.0241935	0.446709
3101	0.133982	0.951985
832	0.0136869	0.575615
161	0.0139843	0.407783
5832	0.0449107	0.483773
2671	0.134932	1.25033
8914	0.145078	0.933343
23649	0.139081	0.988755
5318	0.150419	1.06125
6297	0.121596	1.35297
8575	0.0240199	0.399872
26986	0.0067243	0.057491
55093	0.132732	1.03973
100132565	N/A	N/A
54810	0.133103	1.21061
705	0.0692771	0.829689
81786	0.0387404	0.831957
153830	0.0532544	0.382825
55015	0.0747469	0.690063
2494	0.098605	0.349409
4780	0.188559	1.05552
8520	0.112544	0.585939
2990	0.169885	1.31911
9710	0.0857388	0.476279
51290	0.0571809	0.597124
80279	0.111132	1.00825
124245	0.0724969	0.845746
79886	0.158923	N/A
85439	0.126801	0.804036
3371	0.117803	0.966672
29927	0.00092302	0.188177
999	0.146427	N/A
10487	0.0785773	0.614866
10449	0.11018	0.812411
25813	0.0274809	0.908655
3939	0.064369	0.444118
3615	0.0101887	0.197495
81608	0.022138	0.440362
4191	N/A	0.554956
23650	0.0577446	0.786564
5954	0.0400062	0.619762
813	0.0808571	0.607217
6194	0.000989819	0.390992
6160	0.0507047	N/A
55178	0.261036	1.39743
10146	0.0464791	0.313383
7171	0.127328	0.509467
7170	0.153237	0.147398
7169	0.101065	0.623613
7168	0.115153	0.160335
29766	0.112186	0.490295
23384	0.0466955	0.436032
142	0.0493795	0.727735
10398	0.00257674	0.225418
4637	0.0531646	0.30473
103910	0	0.0865022
4627	0.0126607	0.25801
79784	0.0262868	0.540636
4628	0.00628834	0.187336
4008	0.226861	1.33682
83481	N/A	N/A
23603	0.0178807	0.15206
7431	0.0237129	0.49444
7157	0.243889	1.27157
6742	N/A	0.735696
6223	0.0114464	0.545825
5493	0.0448093	0.997845
5339	0.0186254	0.619121
4634	0.042008	0.430132
10627	0.00576028	0.136536
57644	0.0167389	0.347789
4629	0.0145654	0.432476
10903	N/A	0.804682
9643	0.0326379	0.182255
3150	0.0501538	1.02448
3159	0.0481207	0.361456
28974	0.0742496	N/A
8815	0.0603675	0.295604
23160	0.152043	0.91554
134430	0.127478	1.14462
84916	N/A	0.797557
9868	0.0808339	0.815366
10953	0.16214	1.19063
8467	0.0243731	0.295053
83443	0.00225971	0.292914
26156	0.364899	2.459
6141	0.0255503	0.47047
6138	0	N/A
55131	0.215928	1.14136
22913	0.124594	0.782892
5885	0.0188276	0.224767
9933	0.0941991	0.912717
5713	0.011861	0.4502
5709	0.0191145	0.555399
27043	0.149617	1.16472
1728	0.129588	0.880661
51602	0.0603695	0.565929
9221	0.366766	1.47988
84365	0.321393	2.07471
55506	0.0126183	0.178977
9555	0.0161256	0.277968
221092	0.0741227	0.309316
3189	0.012564	0.0885817
10949	0.012628	0.428605
333932	N/A	N/A
8350	N/A	N/A
3020	N/A	N/A
440686	N/A	0.406942
128312	0.00464063	0.241407
8342	N/A	0.303189
94239	0	0.53601
3014	0.0126568	0.235956
3013	N/A	N/A
8338	N/A	0.179963
3008	0.0320477	0.265649
3007	0.0391178	1.07235
3006	0.0251316	0.639422
54433	0.0364671	0.40597
117246	0.135706	1.12378
2091	0.0388854	0.407612
9521	0.193712	0.623625
1841	0.150952	1.11472
1736	0.100504	0.57074
51202	0.0381542	0.514333
1211	0.0202523	0.339582
25978	0.00300958	0.491405
23468	0.0262523	N/A
353	0.0962842	1.0914
23352	0.027976	0.324914
8878	0.0829234	1.14408
23654	0.0581353	1.01076
4233	0.108734	0.869085
3959	0.182524	2.36424
3914	0.132328	1.48216
56888	0.0523583	0.240944
3688	0.0681387	0.560349
10525	N/A	0.878402
3309	0.0197017	0.222716
7184	0.0222469	0.417913
2734	0.030303	0.607579
23071	0.0741078	0.633888
5611	0.0235199	0.254595
51726	0.0195217	0.361679
66005	0.0869638	1.25663
57214	0.0818561	0.765203
57003	0.0219489	0.59287
821	0.0623742	0.621921
811	0.0318649	0.575543
213	0.21219	2.04922
7542	0.0693496	0.803867
7514	0.0196502	0.403456
143187	0.0517989	0.795995
11311	N/A	0.571631
51337	0.0394086	N/A
3703	0.00829493	0.257396
58477	0.0689602	1.00822
6734	0.0343831	0.60138
6520	0.25979	1.69967
60386	0.197153	1.41134
6510	0.0864456	1.18886
6566	0.135756	1.13615
11231	0.0436121	0.63656
10952	0.00954927	0.282589
6185	0.0997872	0.736939
6184	0.0373846	0.640547
285282	0.118502	0.409671
5721	N/A	0.620052
10113	0.161258	0.972541
10960	0.0315635	0.483161
3998	0.0995641	0.799849
3482	0.133084	1.4229
51144	0.258958	1.2783
3163	0.0862952	0.879303
51495	0.0858325	0.88476
2064	0.109017	0.852532
780	0.0521467	0.523942
1650	0.0348148	N/A
1374	0.0634155	0.859426
1312	0.0934996	1.82308
28969	0.0100444	0.268352
488	0.0121681	0.256811
476	0.0341833	0.285556
55342	0.0212601	0.244441
6210	0.00101911	0.278467
9761	0.0486641	0.458548
3105	N/A	3.0606
57018	0.0315893	0.298796
9590	0.288397	2.47936
7429	0.0823437	0.767274
7419	0.0218085	0.35702
7416	0.0125193	0.150364
10452	0.0616732	0.802804
83442	0.0328673	0.806673
64236	0.109095	1.8777
9124	0.0971042	0.645722
10763	0.483843	2.62756
113230	N/A	N/A
51474	0.212942	1.43918
3898	0.218764	2.72024
3710	0.0210932	0.381002
3709	0.0223701	0.261396
3708	0.0105299	0.252838
10989	0.1629	0.770574
8139	0.0128064	0.199611
2317	0.0373801	0.325041
79180	0.0131462	0.731258
1627	0.166105	1.08392
57482	0.25911	1.87502
1327	0.10717	1.31994
54927	0.104837	0.848893
83543	0.0321897	1.07737
23613	0.10293	0.453596
7112	0.303929	0.706374
6389	0.0448801	0.501969
51586	0.0896285	0.629804
151963	0.010415	N/A
3251	0.0549165	0.384271
10049	0.1898	1.08429
515	0.267025	1.35728
506	0.0432852	0.321034
163033	0.0803691	0.500682
23339	0.0379512	0.406456
55823	N/A	0.781884
55325	0.138446	0.673457
9789	0.0638646	0.829324
6652	0.158913	0.943014
5831	0.0627545	0.707708
29968	0.0631186	0.7557
29085	0.119878	1.37199
5092	0.00831882	0.233872
54953	0.20026	N/A
51079	0.0407991	N/A
4048	0.0753798	0.804311
3845	0.142829	0.331574
51031	0.111944	1.13461
4072	0.135777	1.79833
23333	0.114348	0.757438
5977	0.0134346	0.174287
9377	0.255149	0.921013
23155	0.290912	1.56097
521	0.0831884	0.786743
230	0.0254197	0.264231
226	0.0607583	0.340419
38	0.192562	0.744465
6280	0.354621	2.71002
4643	0.0325231	0.320562
126353	N/A	N/A
1829	0.180024	1.75755
1509	0.0915254	1.04147
5315	0.0581867	N/A
4522	0.0674603	0.584429
121457	0.188936	1.19375
2107	0	0.225263
9669	0.0765558	0.872471
1936	0.118572	1.36991
10327	0.0704671	0.635132
7408	0.163596	0.814983
7167	0.0830732	N/A
6158	0.0679289	0.564123
6137	N/A	0.562809
5985	0.0547264	0.575619
3336	0.0494918	0.641553
8290	0.00322729	0.402894
396	0.0105381	0.627888
5636	0.0110132	0.360242
5635	0.025	0.243496
5634	0.00953947	0.247085
5631	0.00418877	0.230547
85364	0.0575942	0.613781
10280	0.0758416	0.615864
388697	0.213478	5.37975
80829	0.140562	N/A
22980	0.0721227	1.2025
8148	0.0900757	0.474741
6786	0.0409968	0.389884
8879	0.172468	1.0051
6421	0.0563818	0.406979
55153	0.0517301	0.569556
6181	0.00778899	0.457114
6169	0.0101642	0.324169
55771	0.356812	1.68697
4841	0.02	0.222474
51149	0.607758	N/A
112950	0.0452236	0.678733
29079	0.0497528	0.47304
55588	0.0532902	0.825661
9862	0.043582	0.427063
9439	0.0331443	0.340017
9440	0.0266845	0.467941
9282	0.0428416	0.313983
4113	0.679136	3.13881
3614	0.0173482	0.421208
81610	0.152051	1.56112
23404	0.0553455	0.524479
80153	0.044966	0.498966
9646	0.0199219	0.697299
11101	0.232796	1.13464
1176	0.000879121	0.356817
8943	0.0412314	0.649794
8546	0.136026	0.616078
10189	0.0322581	N/A
5479	0.0669704	0.446838
10130	0.0454321	0.705703
9601	0.103286	0.945763
2923	0.0939927	0.651905
5096	0.081726	0.417211
5095	0.119667	0.714128
5034	0.0379826	0.737235
3954	0.104705	1.08411
93974	0.258231	1.391
64710	0.0488204	0.360977
10473	N/A	0.534797
3151	N/A	0.244022
11335	0	0.149113
9967	0.0798243	0.501213
6418	0.0764485	0.456021
3655	0.0689867	0.623941
3069	0.0210124	0.613646
2618	N/A	0.982296
23344	0.122945	0.81986
2079	0	0.324333
1982	0.0230856	0.389052
1973	0	N/A
1915	0.00245399	N/A
7812	0.0286316	0.609244
9774	0.0464405	0.216708
440	0.0517271	0.88834
23376	0.095798	N/A
6711	0.0140178	0.353014
6709	0.0114556	0.294646
58517	0.00432246	0.268679
55660	0.031694	0.463165
170954	0.294789	N/A
5209	0.0286161	0.587771
10933	0.00294651	0.599591
79026	0.161651	N/A
7381	0.339746	1.0589
27000	0.0525907	0.624117
6525	0.202684	1.33744
5230	0.0349741	0.385354
3945	0.0115376	0.2798
2597	N/A	0.366801
1213	0.00123396	0.327623
7082	0.100671	0.734472
6494	0.0682272	1.13058
1611	0.0481618	0.741671
10523	0.0186459	0.565608
32	0.0670307	0.717628
31	0.0303437	0.499845
6840	0.132684	1.22012
5573	0.0263461	0.351032
4659	0.0828426	0.380138
4642	0.0222405	0.43021
4430	0.0191628	0.196908
399687	0.0349022	0.405216
2770	0	0.0939761
286077	0.0494305	1.09767
51106	0.181838	0.000673764
10492	0.00892288	0.14098
6203	0	0.277698
6202	0	N/A
6191	0	0.313976
6229	0.0109838	1.78663
6159	N/A	0.899542
6157	N/A	0.332768
494115	N/A	0.695831
27316	0.0184825	0.146238
84305	0.0720242	0.799709
51491	0.187197	1.23267
65003	0.125046	0.964099
4343	0.0897827	0.921483
55132	0.254438	0.847074
23367	0.129477	0.638748
50809	0.122352	0.605218
10236	0.00517943	0.0994673
3182	0.0693919	0.472445
220988	0.0095064	0.232965
3181	0.0135091	0.139274
3178	0.00796703	0.142361
3009	0.00678409	0.262566
29889	0.140894	0.838284
9908	0.0231684	0.170741
1993	0.00688924	0.047921
27292	0.0405713	N/A
84319	0.195055	N/A
8436	0.106573	1.08788
284119	0.0328844	0.624048
4076	0.040674	0.4109
29777	N/A	1.14661
3980	0.151455	0.746648
2010	0.176456	2.16124
6161	0	0.423963

## Sheet: S5
Table S5. Network proximity-based drug screening results against the SARS-CoV-2 human host factors for the top 189 drugs.
Drugbank ID	Name	Z score	FDR	# Clinical trials as of 6.20.2021
DB01029	Irbesartan	-5.087	0.0054057	2
DB00321	Amitriptyline	-4.322	0.0123549	0
DB00871	Terbutaline	-4.161	0.00288605	0
DB00651	Dyphylline	-3.909	0.00288605	0
DB00165	Pyridoxine	-3.662	0.00288605	1
DB00500	Tolmetin	-3.564	0.00288605	0
DB00677	Isoflurophate	-3.513	0.00288605	0
DB01210	Levobunolol	-3.484	0.00288605	0
DB00862	Vardenafil	-3.447	0.00288605	0
DB01366	Procaterol	-3.413	0.00288605	0
DB05219	Crisaborole	-3.379	0.00288605	0
DB00208	Ticlopidine	-3.361	0.00288605	0
DB00221	Isoetarine	-3.334	0.00288605	0
DB09068	Vortioxetine	-3.263	0.00288605	0
DB01698	Rutin	-3.253	0.00288605	0
DB00562	Benzthiazide	-3.25	0.00288605	0
DB01117	Atovaquone	-3.225	0.00288605	2
DB00574	Fenfluramine	-3.202	0.00288605	0
DB00740	Riluzole	-3.145	0.00288605	0
DB01091	Butenafine	-3.14	0.00288605	0
DB00936	Salicylic acid	-3.061	0.00288605	0
DB00397	Phenylpropanolamine	-3.055	0.00288605	0
DB01346	Quinidine barbiturate	-3.014	0.00288605	0
DB01241	Gemfibrozil	-2.993	0.00288605	0
DB01001	Salbutamol	-2.926	0.00288605	0
DB01095	Fluvastatin	-2.917	0.00288605	0
DB00938	Salmeterol	-2.866	0.00288605	0
DB00118	Ademetionine	-2.855	0.00781383	0
DB09213	Dexibuprofen	-2.815	0.00288605	0
DB06262	Droxidopa	-2.777	0.00781383	0
DB00784	Mefenamic acid	-2.776	0.00781383	0
DB01158	Bretylium	-2.75	0.00288605	0
DB01014	Balsalazide	-2.727	0.00288605	0
DB00713	Oxacillin	-2.726	0.00288605	0
DB00491	Miglitol	-2.721	0.00288605	0
DB01009	Ketoprofen	-2.719	0.00288605	0
DB04743	Nimesulide	-2.717	0.00288605	1
DB00174	Asparagine	-2.708	0.00288605	0
DB00449	Dipivefrin	-2.705	0.00288605	0
DB00207	Azithromycin	-2.688	0.00288605	86
DB01359	Penbutolol	-2.678	0.00288605	0
DB00356	Chlorzoxazone	-2.669	0.00288605	0
DB05018	Migalastat	-2.669	0.00288605	0
DB01032	Probenecid	-2.654	0.00288605	0
DB00806	Pentoxifylline	-2.649	0.00288605	3
DB04861	Nebivolol	-2.648	0.0054057	0
DB00217	Bethanidine	-2.62	0.00288605	0
DB00571	Propranolol	-2.62	0.00781383	0
DB00960	Pindolol	-2.615	0.0054057	0
DB00706	Tamsulosin	-2.61	0.0145807	0
DB00388	Phenylephrine	-2.607	0.00288605	0
DB00851	Dacarbazine	-2.579	0.0101485	0
DB00176	Fluvoxamine	-2.558	0.00288605	3
DB00554	Piroxicam	-2.558	0.00288605	0
DB00580	Valdecoxib	-2.555	0.0145807	0
DB01351	Amobarbital	-2.554	0.00781383	0
DB01365	Mephentermine	-2.551	0.0054057	0
DB03766	Propanoic acid	-2.551	0.00288605	0
DB00631	Clofarabine	-2.54	0.00288605	0
DB03754	Tromethamine	-2.54	0.00781383	0
DB00972	Azelastine	-2.523	0.00288605	0
DB00598	Labetalol	-2.516	0.00781383	0
DB01544	Flunitrazepam	-2.513	0.00288605	0
DB00808	Indapamide	-2.507	0.0229531	0
DB00772	Malathion	-2.494	0.0054057	0
DB01156	Bupropion	-2.492	0.00288605	0
DB08896	Regorafenib	-2.489	0.0229531	0
DB01364	Ephedrine	-2.478	0.00288605	0
DB00712	Flurbiprofen	-2.473	0.00288605	0
DB00533	Rofecoxib	-2.461	0.00288605	0
DB00914	Phenformin	-2.459	0.0123549	0
DB01016	Glyburide	-2.453	0.00781383	0
DB00606	Cyclothiazide	-2.451	0.0054057	0
DB00120	L-Phenylalanine	-2.445	0.0123549	0
DB02530	gamma-Aminobutyric acid	-2.438	0.0054057	0
DB01105	Sibutramine	-2.437	0.00288605	0
DB00999	Hydrochlorothiazide	-2.428	0.0054057	0
DB08954	Ifenprodil	-2.415	0.00781383	2
DB00824	Enprofylline	-2.409	0.00288605	0
DB00849	Methylphenobarbital	-2.409	0.0054057	0
DB06712	Nilvadipine	-2.406	0.0145807	0
DB09093	Chlortetracycline	-2.403	0.00288605	0
DB01353	Butobarbital	-2.393	0.0054057	0
DB01205	Flumazenil	-2.387	0.0187582	0
DB00524	Metolazone	-2.386	0.0145807	0
DB00231	Temazepam	-2.378	0.0145807	0
DB00613	Amodiaquine	-2.373	0.00781383	2
DB01250	Olsalazine	-2.372	0.00288605	0
DB00155	L-Citrulline	-2.336	0.0229531	2
DB00134	Methionine	-2.335	0.00288605	0
DB00987	Cytarabine	-2.332	0.00288605	0
DB01212	Ceftriaxone	-2.33	0.0123549	1
DB00264	Metoprolol	-2.327	0.00288605	1
DB01611	Hydroxychloroquine	-2.323	0.00288605	300
DB01194	Brinzolamide	-2.321	0.0165588	0
DB01587	Ketazolam	-2.32	0.00288605	0
DB03088	Pidolic Acid	-2.316	0.0054057	0
DB00759	Tetracycline	-2.315	0.00288605	0
DB01400	Neostigmine	-2.315	0.00288605	0
DB00668	Epinephrine	-2.313	0.0165588	0
DB00993	Azathioprine	-2.306	0.029178	0
DB05381	Histamine	-2.304	0.0145807	0
DB00149	L-Leucine	-2.295	0.00288605	0
DB06694	Xylometazoline	-2.295	0.00781383	0
DB01656	Roflumilast	-2.291	0.00288605	0
DB01296	Glucosamine	-2.288	0.0145807	0
DB00259	Sulfanilamide	-2.286	0.0123549	0
DB06155	Rimonabant	-2.286	0.00781383	0
DB00200	Hydroxocobalamin	-2.285	0.0054057	0
DB00744	Zileuton	-2.284	0.00288605	0
DB02659	Cholic Acid	-2.281	0.029178	0
DB05039	Indacaterol	-2.277	0.0209691	0
DB05260	Gallium nitrate	-2.27	0.00288605	0
DB08439	Parecoxib	-2.269	0.00288605	0
DB05676	Apremilast	-2.268	0.0165588	1
DB00169	Cholecalciferol	-2.267	0.00288605	19
DB08815	Lurasidone	-2.261	0.0054057	0
DB01262	Decitabine	-2.26	0.0054057	1
DB00869	Dorzolamide	-2.256	0.00781383	0
DB00811	Ribavirin	-2.255	0.0145807	12
DB01407	Clenbuterol	-2.254	0.0165588	0
DB00718	Adefovir dipivoxil	-2.25	0.00288605	0
DB00489	Sotalol	-2.246	0.00288605	0
DB02959	Oxitriptan	-2.239	0.0054057	0
DB01144	Diclofenamide	-2.219	0.0123549	0
DB00583	Levocarnitine	-2.217	0.0187582	1
DB00310	Chlorthalidone	-2.215	0.00288605	0
DB01102	Arbutamine	-2.215	0.00288605	0
DB00843	Donepezil	-2.211	0.0187582	0
DB01330	Cefotetan	-2.205	0.0165588	0
DB00366	Doxylamine	-2.198	0.00288605	0
DB01136	Carvedilol	-2.195	0.0311606	0
DB01165	Ofloxacin	-2.193	0.00288605	0
DB00539	Toremifene	-2.19	0.0368605	1
DB02513	Thymol	-2.184	0.00288605	0
DB00404	Alprazolam	-2.18	0.0349242	0
DB00867	Ritodrine	-2.18	0.00288605	0
DB04821	Nomifensine	-2.178	0.0165588	0
DB00570	Vinblastine	-2.175	0.0368605	0
DB00890	Dienestrol	-2.169	0.0427657	0
DB00751	Epinastine	-2.161	0.0229531	0
DB01054	Nitrendipine	-2.159	0.0329865	0
DB00537	Ciprofloxacin	-2.158	0.00288605	0
DB06774	Capsaicin	-2.156	0.0123549	0
DB11581	Venetoclax	-2.152	0.0165588	0
DB01107	Methyprylon	-2.147	0.0271618	0
DB02300	Calcipotriol	-2.147	0.00288605	0
DB02772	Sucrose	-2.147	0.00781383	0
DB00122	Choline	-2.141	0.0329865	0
DB00678	Losartan	-2.14	0.0123549	16
DB01288	Fenoterol	-2.133	0.00288605	0
DB00335	Atenolol	-2.126	0.00288605	0
DB09074	Olaparib	-2.126	0.0101485	0
DB00150	L-Tryptophan	-2.123	0.00288605	0
DB00091	Ciclosporin	-2.12	0.0165588	10
DB00573	Fenoprofen	-2.114	0.0271618	0
DB00316	Acetaminophen	-2.107	0.0368605	1
DB00440	Trimethoprim	-2.098	0.00288605	2
DB00861	Diflunisal	-2.096	0.0271618	0
DB00768	Olopatadine	-2.094	0.00288605	0
DB06691	Mepyramine	-2.094	0.0311606	0
DB00887	Bumetanide	-2.088	0.029178	0
DB00203	Sildenafil	-2.087	0.0229531	2
DB00189	Ethchlorvynol	-2.085	0.0251698	0
DB01437	Glutethimide	-2.084	0.0165588	0
DB01137	Levofloxacin	-2.083	0.0311606	2
DB00932	Tipranavir	-2.08	0.00288605	0
DB00308	Ibutilide	-2.078	0.0054057	0
DB00444	Teniposide	-2.07	0.0251698	0
DB00461	Nabumetone	-2.067	0.00288605	0
DB01559	Clotiazepam	-2.064	0.029178	0
DB07886	Hydrocortisone	-2.062	0.0054057	0
DB00419	Miglustat	-2.061	0.0054057	0
DB01599	Probucol	-2.058	0.00288605	0
DB11605	Myrrh	-2.056	0.00288605	0
DB00136	Calcitriol	-2.052	0.0123549	0
DB09085	Tetracaine	-2.049	0.0187582	0
DB00425	Zolpidem	-2.048	0.00288605	0
DB08813	Nadroparin	-2.046	0.0427657	3
DB00484	Brimonidine	-2.041	0.0101485	0
DB06777	Chenodeoxycholic acid	-2.02	0.00288605	0
DB00641	Simvastatin	-2.016	0.0329865	3
DB01138	Sulfinpyrazone	-2.016	0.00288605	0
DB00234	Reboxetine	-2.015	0.0123549	0
DB00292	Etomidate	-2.014	0.0311606	0
DB00451	Levothyroxine	-2.005	0.0408354	0
DB00912	Repaglinide	-2.002	0.00288605	0
DB00250	Dapsone	-2.001	0.00288605	0
DB01079	Tegaserod	-2.001	0.0388853	0

## Sheet: S6
Table S6. Anti-SARS-CoV-2 profiles of the top 21 drugs with at least two desired activities.
		Carvedilol	Apremilast	Mefenamic acid	Balsalazide	Azithromycin	Toremifene	Hydrochlorothiazide	Nilvadipine	Amodiaquine	Tetracycline	Xylometazoline	Decitabine	Adefovir dipivoxil	Venetoclax	Calcipotriol	Amitriptyline	Fenoprofen	Tipranavir	Probucol	Brimonidine	Repaglinide
Live Virus Infectivity	SARS-CoV-2 cytopathic effect (CPE)	ACTIVE				ACTIVE				ACTIVE		ACTIVE				ACTIVE	ACTIVE
	SARS-CoV-2 cytopathic effect (host tox Counter) / Cytotoxicity						ACTIVE								ACTIVE
Human Cell Toxicity	Human fibroblast toxicity (hCYTOX)																		ACTIVE
Viral Entry	Spike-ACE2 protein-protein interaction (AlphaLISA)	ACTIVE	ACTIVE	ACTIVE	ACTIVE		ACTIVE	ACTIVE	ACTIVE		ACTIVE				ACTIVE	ACTIVE		ACTIVE	ACTIVE	ACTIVE	ACTIVE	ACTIVE
	Spike-ACE2 protein-protein interaction (TruHit Counter)	ACTIVE					ACTIVE		ACTIVE	ACTIVE	ACTIVE				ACTIVE	ACTIVE			ACTIVE
	ACE2 enzymatic activity	ACTIVE													ACTIVE					ACTIVE
In vitro Infectivity	SARS-CoV pseudotyped particle entry (CoV-PPE)	ACTIVE	ACTIVE	ACTIVE		ACTIVE	ACTIVE	ACTIVE	ACTIVE	ACTIVE		ACTIVE	ACTIVE	ACTIVE	ACTIVE	ACTIVE	ACTIVE		ACTIVE	ACTIVE		ACTIVE
	SARS-CoV pseudotyped particle entry counter screen (CoV-PPE_cs)						ACTIVE			ACTIVE
	MERS-CoV pseudotyped particle entry (MERS-PPE)	ACTIVE				ACTIVE	ACTIVE	ACTIVE	ACTIVE	ACTIVE			ACTIVE	ACTIVE		ACTIVE	ACTIVE	ACTIVE	ACTIVE
	MERS-CoV pseudotyped particle entry counter screen (MERS-PPE_cs)									ACTIVE
Viral Replication	3CL enzymatic activity				ACTIVE		ACTIVE				ACTIVE				ACTIVE				ACTIVE		ACTIVE
	blank = INACTIVE
Desired properties	Active in CPE	Yes	No	No	No	Yes	No	No	No	Yes	No	Yes	No	No	No	Yes	Yes	No	No	No	No	No
	Inactive in cytotox	Yes	Yes	Yes	Yes	Yes	No	Yes	Yes	Yes	Yes	Yes	Yes	Yes	No	Yes	Yes	Yes	Yes	Yes	Yes	Yes
	Inactive in hCYTOX	Yes	Yes	Yes	Yes	Yes	Yes	Yes	Yes	Yes	Yes	Yes	Yes	Yes	Yes	Yes	Yes	Yes	No	Yes	Yes	Yes
	Active in AlphaLISA	Yes	Yes	Yes	Yes	No	Yes	Yes	Yes	No	Yes	No	No	No	Yes	Yes	No	Yes	Yes	Yes	Yes	Yes
	Inactive in TruHit	No	Yes	Yes	Yes	-	No	Yes	No	No	No	-	-	-	No	No	-	Yes	No	Yes	Yes	Yes
	Inactive in ACE2	No	Yes	Yes	Yes	Yes	Yes	Yes	Yes	Yes	Yes	Yes	Yes	Yes	No	Yes	Yes	Yes	Yes	No	Yes	Yes
	Active in CoV-PPE	Yes	Yes	Yes	No	Yes	Yes	Yes	Yes	Yes	No	Yes	Yes	Yes	Yes	Yes	Yes	No	Yes	Yes	No	Yes
	Inactive in CoV-PPE_cs	Yes	Yes	Yes	-	Yes	No	Yes	Yes	No	-	Yes	Yes	Yes	Yes	Yes	Yes	-	Yes	Yes	-	Yes
	Active in MERS-PPE	Yes	No	No	No	Yes	Yes	Yes	Yes	Yes	No	No	Yes	Yes	No	Yes	Yes	Yes	Yes	No	No	No
	Inactive in MERS-PPE_cs	Yes	-	-	-	Yes	Yes	Yes	Yes	No	-	-	Yes	Yes	-	Yes	Yes	Yes	Yes	-	-	-
	Active in 3CL	No	No	No	Yes	No	Yes	No	No	No	Yes	No	No	No	Yes	No	No	-	Yes	No	Yes	No

## Sheet: S7
Table S7. Electronic health record-based validation using Northwestern Medicine Enterprise Data Warehouse dataset for the top drugs.
Carvedilol
Group	Subgroup	PS matching type	Odds ratio (95% CI)	P (Wald's test)	P (LR-test)
All	All	raw	0.57 (0.5,0.65)	0.001	0.001
All	All	comorbidity matched	0.8 (0.68,0.94)	0.008	0.008
Race	Black	raw	0.65 (0.51,0.83)	0.001	0.001
Race	Black	comorbidity matched	0.73 (0.54,0.98)	0.04	0.038
Race	White	raw	0.51 (0.43,0.61)	0.001	0.001
Race	White	comorbidity matched	0.7 (0.57,0.87)	0.001	0.001
Sex	Female	raw	0.59 (0.48,0.72)	0.001	0.001
Sex	Female	comorbidity matched	0.77 (0.6,1)	0.047	0.046
Sex	Male	raw	0.54 (0.45,0.64)	0.001	0.001
Sex	Male	comorbidity matched	0.69 (0.56,0.85)	0.001	0.001
Hydrochlorothiazide
Group	Subgroup	PS matching type	Odds ratio (95% CI)	P (Wald's test)	P (LR-test)
All	All	raw	0.51 (0.4,0.64)	< 0.001	< 0.001
All	All	comorbidity matched	0.62 (0.47,0.82)	< 0.001	< 0.001
Race	Black	raw	0.73 (0.49,1.08)	0.114	0.099
Race	Black	comorbidity matched	0.72 (0.44,1.17)	0.18	0.177
Race	White	raw	0.46 (0.34,0.62)	< 0.001	< 0.001
Race	White	comorbidity matched	0.65 (0.45,0.94)	0.022	0.02
Sex	Female	raw	0.63 (0.44,0.91)	0.013	0.011
Sex	Female	comorbidity matched	1 (0.6701,1.4923)	1	1
Sex	Male	raw	0.41 (0.28,0.59)	< 0.001	< 0.001
Sex	Male	comorbidity matched	0.48 (0.31,0.73)	< 0.001	< 0.001

## Sheet: S8
Table S8. Data summary of Cleveland Clinic COVID-19 registry.
	All individuals		SARS-CoV-2 positive patients
	Carvedilol-	Carvedilol+	Carvedilol-	Carvedilol+
Total	164501	4211	81482	1858
Age	48.05 ± 20.92	66.53 ± 14.95	47.58 ± 20.94	67.18 ± 14.29
Sex, female	92,021 (55.9)	1,791 (42.5)	44,999 (55.2)	790 (42.5)
Race
Black	31,397 (19.1)	1,442 (34.2)	14,798 (18.2)	612 (32.9)
White	108,250 (65.8)	2,446 (58.1)	54,440 (66.8)	1,114 (60.0)
Other	8,826 (5.4)	157 (3.7)	4,126 (5.1)	56 (3.0)
Age is shown as mean ± standard deviation. All other characteristics are shown as number of cases (percentage).

## Sheet: S9
Table S9. Protein-protein interactions among carvedilol targets and SARS-CoV-2 host factors.
Carvedilol targets	SARS-CoV-2 host factors
VCAM1	HNRNPA1
APP	POLA2
VCAM1	H3-4
APP	OTX2
VCAM1	VASP
ADRB2	DDOST
VCAM1	DBN1
VCAM1	H1-4
APP	ABT1
HIF1A	FHL2
VCAM1	HP1BP3
VCAM1	APRT
GJA1	CAV1
ADRB2	HSP90B1
VCAM1	HSPA5
HTR2C	ASPH
VCAM1	PKM
VCAM1	DIMT1
VCAM1	EIF4G2
VEGFA	ADAMTS1
ADRB2	SRPRB
ADRB2	DSG2
APP	HMGA1
APP	DDX47
ADRB2	EIF2B1
VCAM1	H2AC7
HTR2C	HMOX2
APP	ITGA6
KCNH2	CAV1
VCAM1	RPL13
HIF1A	PGK1
ADRB2	CANX
APP	PGM1
DRD3	RDX
VCAM1	CAPRIN1
APP	GAPDH
APP	PYM1
VCAM1	XPO1
ADRB2	AKAP12
APP	TNFRSF21
APP	MYH9
VCAM1	VIM
KCNH2	CALR
VCAM1	HNRNPR
ADRB2	SERPINH1
VCAM1	HMGA1
VCAM1	CTSD
SELE	GLG1
ADRB2	EEF1D
VCAM1	PLEC
APP	BYSL
VCAM1	CORO1C
ADRB2	PDIA6
VCAM1	STON2
HTR2C	RETREG3
VCAM1	HNRNPA3
APP	SHMT2
VCAM1	ALDOA
APP	GLOD4
ADRB2	LMNB1
ADRA2A	EIF2B1
GJA1	TJP1
ADRB2	ATP5F1B
VCAM1	EIF4A1
APP	HP1BP3
SLC47A1	TPM2
ADRB2	IMMT
ADRB2	ATP2A2
VCAM1	MYH9
APP	PSME2
VCAM1	PPA1
VCAM1	TOMM34
APP	RPS19
VCAM1	ATP5PO
VCAM1	HNRNPA0
ADRB2	COMT
ADRB2	EEF1A1
HIF1A	LDHA
ADRA2B	EIF2B1
APP	MED4
ADRB2	ATP1A1
APP	EFHD2
ADRB2	VDAC1
APP	RPS9
VCAM1	BYSL
VCAM1	SDCBP
APP	VDAC2
VCAM1	PSMD2
ADRB2	NUP93
APP	SET
VCAM1	RPL32
VCAM1	HNRNPA2B1
APP	MED24
VCAM1	CAPZB
VCAM1	IGF2R
APP	MRPL11
APP	MED8
HTR2C	CAV1
ADRB2	TOMM70
VCAM1	RPL31
APP	ACAA2
ADRB2	HSPA5
HTR6	CLTC
VCAM1	TMPO
APP	AP2A2
VCAM1	HNRNPH3
VCAM1	H3C15
APP	TPI1
VCAM1	RPS19
ADRA2C	EIF2B1
VCAM1	RPS15A
APP	FYCO1
HTR2C	ATP5F1B
VCAM1	H4C1
VCAM1	ETF1
APP	VIM
ADRB2	SEC61A1
APP	SNX27
VCAM1	RPS9
APP	CTSD
APP	DNAJB6
ADRB2	RPN1
APP	H2AZ2
VCAM1	VDAC2
VCAM1	CLTC
VCAM1	LDHA
VCAM1	CSE1L
VCAM1	WDR36
VCAM1	H1-5
APP	CHID1
HTR2A	GNAI1
GJA1	PSMD2
VCAM1	RPS4X
ADRA1B	ALB
VCAM1	CHCHD3
VCAM1	SPTBN1
APP	FHL2
VCAM1	RPS8
ADRB2	SLC3A2
APP	LIMA1
VCAM1	HSPE1
VCAM1	SFPQ
APP	KRAS
SLC6A4	CANX
APP	LMAN1
VCAM1	ALDH18A1
APP	ATP5PO
VCAM1	SDHA
VCAM1	RPL15
VCAM1	EEF1D
VCAM1	RPL18
APP	HMOX2
ADRB2	ARHGDIA
VCAM1	RPL28
APP	FERMT3
APP	RSL1D1
APP	ASPH
VCAM1	G3BP1
HIF1A	MED14
SELE	ACTN2
HIF1A	MED15
VCAM1	H1-3
APP	LAD1
APP	ALB
VCAM1	EMD
APP	ERH
VCAM1	LDHB
ADRB2	GAPDH
APP	NOP16
VCAM1	RPS6
APP	RPL31
VCAM1	SEC61B
ADRB2	ELOC
DRD3	GNAI1
APP	MRM3
APP	COPB1
NDUFC2	NDUFA13
APP	COX4I1
ADRB2	ALDOA
HIF1A	PKM
APP	H4C1
APP	MACROH2A1
VCAM1	MTHFD1
VCAM1	FERMT3
VCAM1	FLNB
ADRB2	EIF4A1
VCAM1	RSL1D1
APP	LARP1B
VCAM1	IMMT
ADRB2	SHMT2
APP	PDIA3
ADRB2	ATP5PO
SLC6A4	CALR
HTR2C	ATP5PB
VCAM1	SMARCA5
ADRA2A	GNAI1
APP	TXNDC5
APP	SH3BGRL3
VCAM1	EEF1E1
APP	NOLC1
VCAM1	PYCR1
VCAM1	PSMD3
KCNJ4	CASK
VCAM1	MYL12B
ADRB2	HNRNPA2B1
APP	CLIP4
APP	EIF2S2
APP	SYNCRIP
APP	PRPSAP2
ADRB2	CLTC
APP	MORF4L1
APP	EEF1D
VCAM1	RPN1
VCAM1	ALYREF
VCAM1	DDOST
VCAM1	RPL27A
APP	FIP1L1
APP	GNL2
HIF1A	MED23
APP	SPTAN1
HIF1A	TP53
APP	UTP4
HTR6	COG3
APP	PSAT1
APP	G3BP1
APP	H2BC14
VCAM1	ESYT1
ADRA2A	PSMD2
HIF1A	FAF2
HIF1A	ELOC
APP	LIG3
VCAM1	CBX3
VCAM1	MACROH2A1
ADRB2	VDAC2
VCAM1	ACAT1
VCAM1	LARP1
VCAM1	ITGB1
ADRB2	SDHA
VCAM1	SYNCRIP
VCAM1	FBL
APP	CCNL1
VCAM1	UBAP2L
VCAM1	MYL6
ADRB2	DNAJB11
HIF1A	PARP1
VCAM1	ASNS
APP	RABL3
HTR2C	SEC63
VCAM1	IQGAP1
HIF1A	SQSTM1
VCAM1	RPL38
APP	CAAP1
SELE	LGALS3BP
ADRB2	MTHFD1
ADRB2	ALDH18A1
VCAM1	PABPC1
APP	ARF6
APP	IKBIP
VCAM1	RBMX
VCAM1	LMNB1
VCAM1	ARPC3
VCAM1	NONO
APP	CAV1
VCAM1	RPS24
APP	CALR
APP	PCBD1
APP	H2AC20
APP	DIMT1
ADRB2	REL
NDUFC2	IMPDH1
VCAM1	ATP5F1B
VCAM1	RALY
ABCB1	CAV1
APP	HNRNPA1
VCAM1	MYO18A
HTR2C	EXTL3
VCAM1	UBR4
HIF1A	PLEKHA5
VCAM1	MYH10
VCAM1	MDH2
VCAM1	GAPDH
ADRB2	PSMD2
HTR2C	IPO11
VCAM1	ATP5ME
HIF1A	NES
VCAM1	RBM14
APP	APRT
VCAM1	PARP1
APP	MAT2B
VCAM1	NUP93
APP	PKM
APP	BCAP31
VCAM1	NQO1
KCNH2	CANX
VCAM1	EEF1A1
ADRB2	RPN2
VCAM1	GART
VCAM1	ACTN4
VCAM1	XRCC6
APP	CAPRIN1
VCAM1	LMNA
VCAM1	VDAC1
VCAM1	HNRNPAB
VCAM1	XPO5
ADRB2	SLC1A5
ADRB2	HSD17B12
ADRB2	KCTD13
VCAM1	CLTA
